# Supplementary material for: Flowing scalable production of sulfenamides by active site-tuned lacunary polyoxometalate foams
Source: Royal Society of Chemistry journal article supplement (doi:10.1039/d3ta01233f), 2023-01-01
Supplement: d3ta01233f1.pdf [file d3ta01233f1.pdf]

## Supporting Information

### Flowing Scalable Production of Sulfenamides by Active Sites Tuned

#### Lacunary Polyoxometalate Foams

Gang Liu,<sup>a,†</sup> Yuquan Qi,<sup>a,†</sup> Yifa Chen,<sup>\*,b</sup> Jiashuai Li,<sup>a</sup> Yilan Chen,<sup>a</sup> Zhen Li,<sup>a</sup> Guodong Shen,<sup>a</sup>  
Delong Ma,<sup>a,c</sup> Yunfeng Li<sup>a,c</sup> and Xianqiang Huang<sup>\*,a</sup>

<sup>a</sup> Shandong Provincial Key Laboratory of Chemical Energy Storage and Novel Cell Technology, School of Chemistry & Chemical Engineering, Liaocheng University, Liaocheng, 252059, Shandong, P. R. China.

<sup>b</sup> School of Chemistry, South China Normal University, Guangzhou, 510006, P. R. China.

<sup>c</sup> National Rubber Additive Engineering Technology Center, Liaocheng, Shandong 252059, China.

\* Corresponding Author: X. Huang (hxq@lcu.edu.cn); Y. Chen (chyf927821@163.com).

† These authors contributed equally to this work.

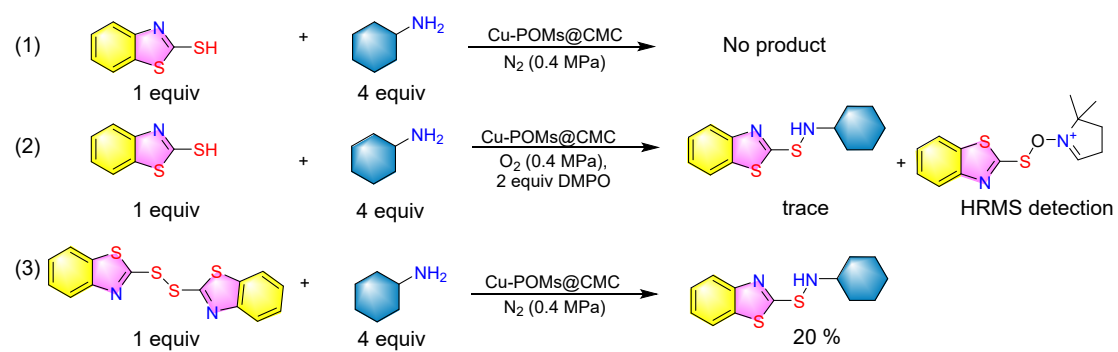

**Scheme S1.** General procedure for the control experiments.

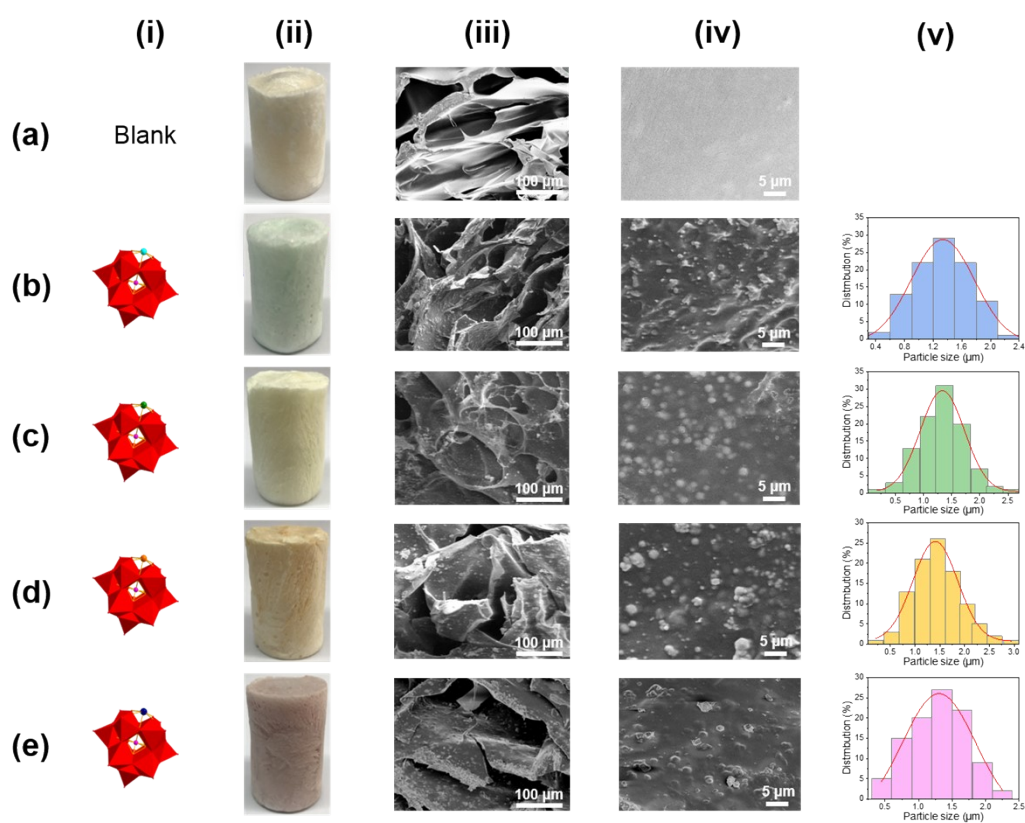

**Figure S1.** SEM characterization of four L-POMs@Foam. (a) CMC foam. (b) Cu-LPOMs@CMC (29 wt%). (c) Ni-LPOMs@CMC (29 wt%). (d) Mn-LPOMs@CMC (29 wt%). (e) Co-LPOMs@CMC (29 wt%). (i) Lacunary polyoxometalates. (ii) Photo images, (iii, iv) SEM images, (v) Size-distribution histograms of the prepared foams.

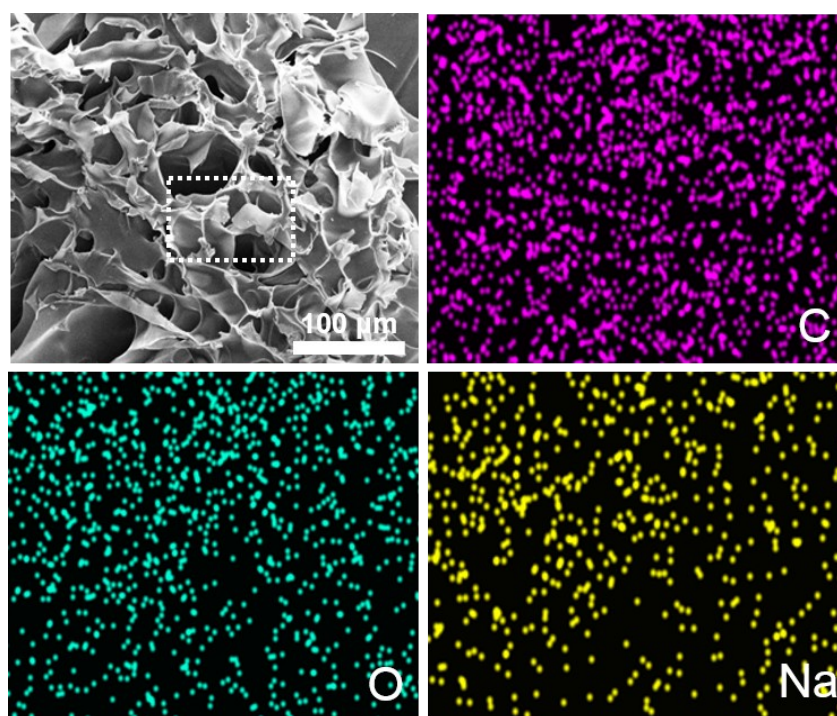

**Figure S2.** Elemental mapping of CMC foam.

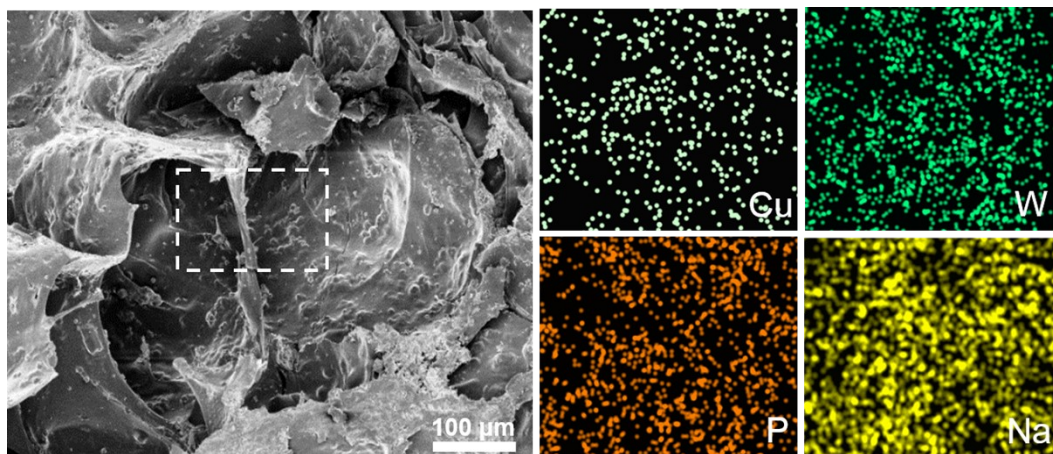

**Figure S3.** Elemental mapping of Cu-LPOMs@CMC (29 wt%).

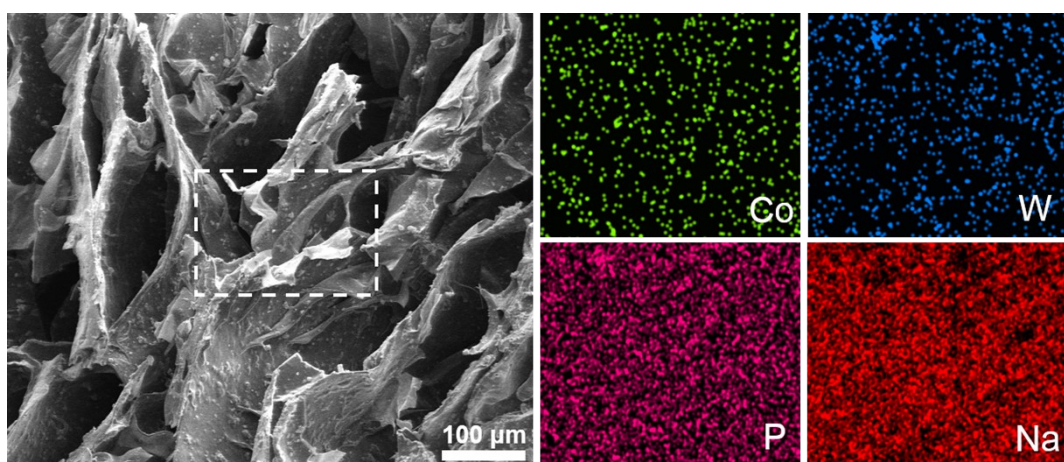

**Figure S4.** Elemental mapping of Co-LPOMs@CMC (29 wt%).

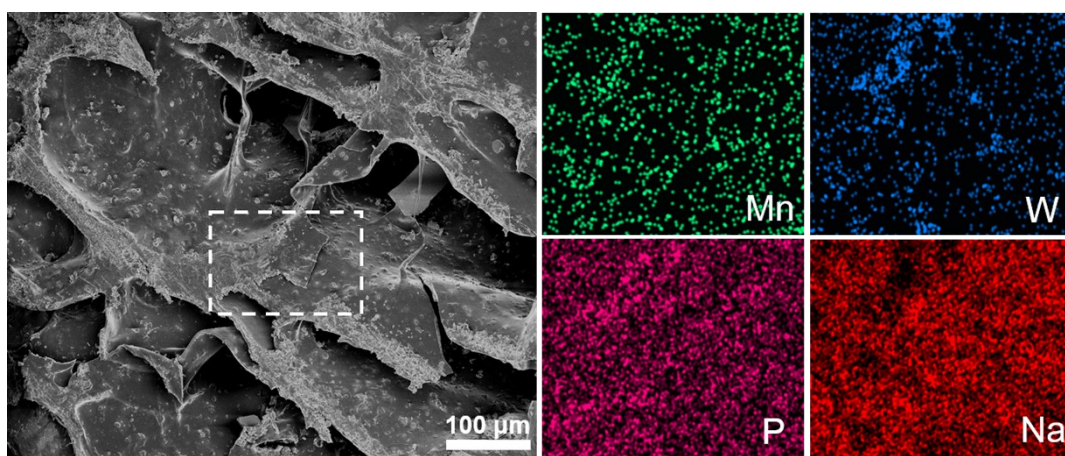

**Figure S5.** Elemental mapping of Mn-LPOMs@CMC (29 wt%).

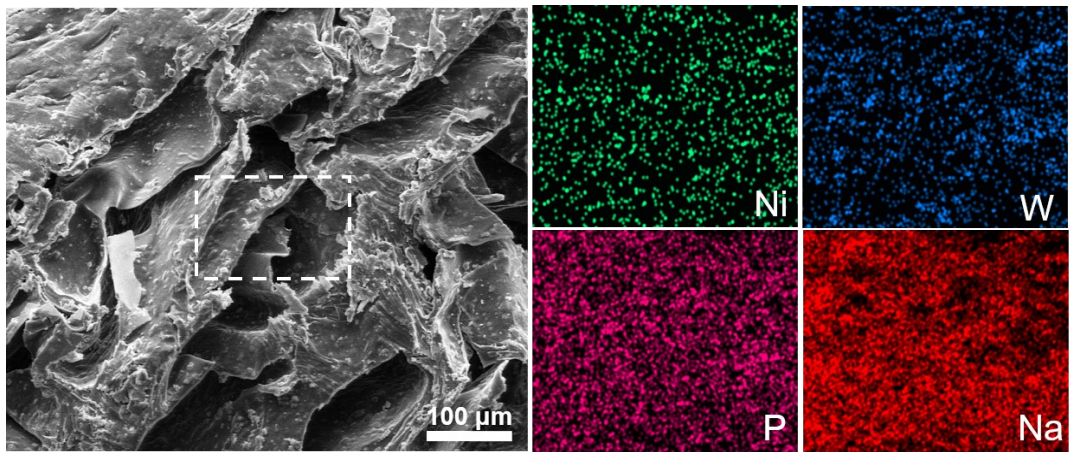

**Figure S6.** Elemental mapping of Ni-LPOMs@CMC (29 wt%).



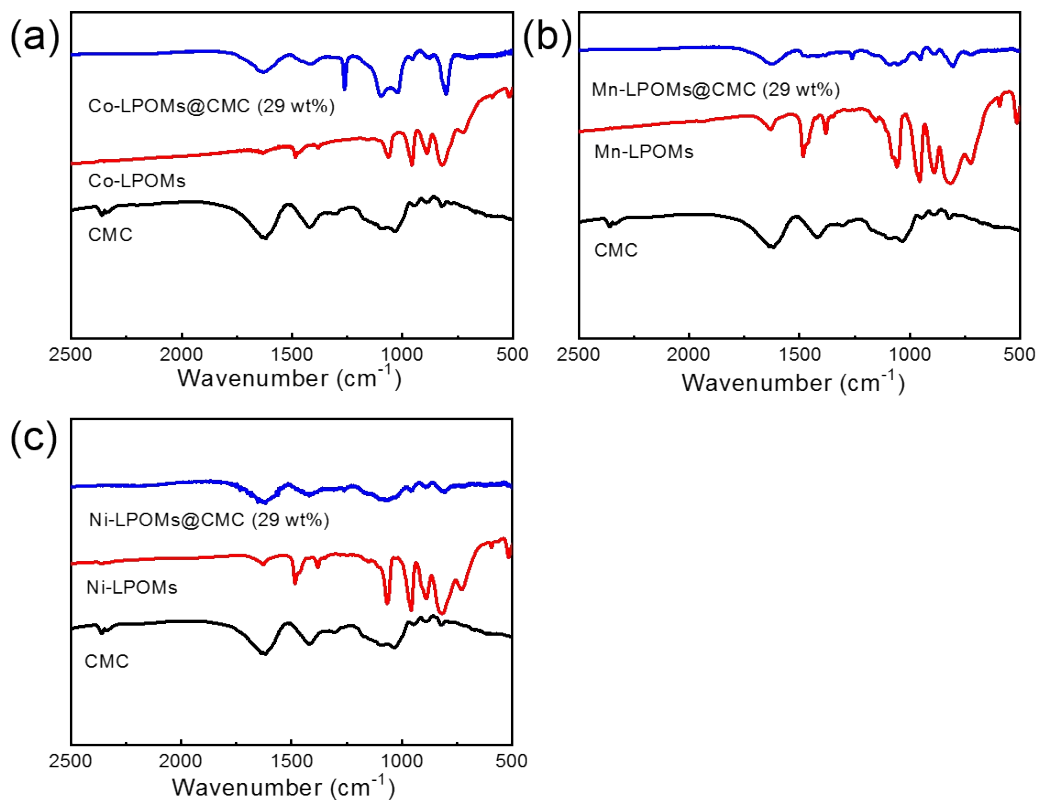

**Figure S7.** FT-IR spectra of TM-LPOMs@CMC (TM = Co, Mn and Ni). (a) FT-IR spectra of CMC, Co-LPOMs and Co-LPOMs@CMC (29 wt%). (b) FT-IR spectra of CMC, Mn-LPOMs and Mn-LPOMs@CMC (29 wt%). (c) FT-IR spectra of CMC, Ni-LPOMs and Ni-LPOMs@CMC (29 wt%).

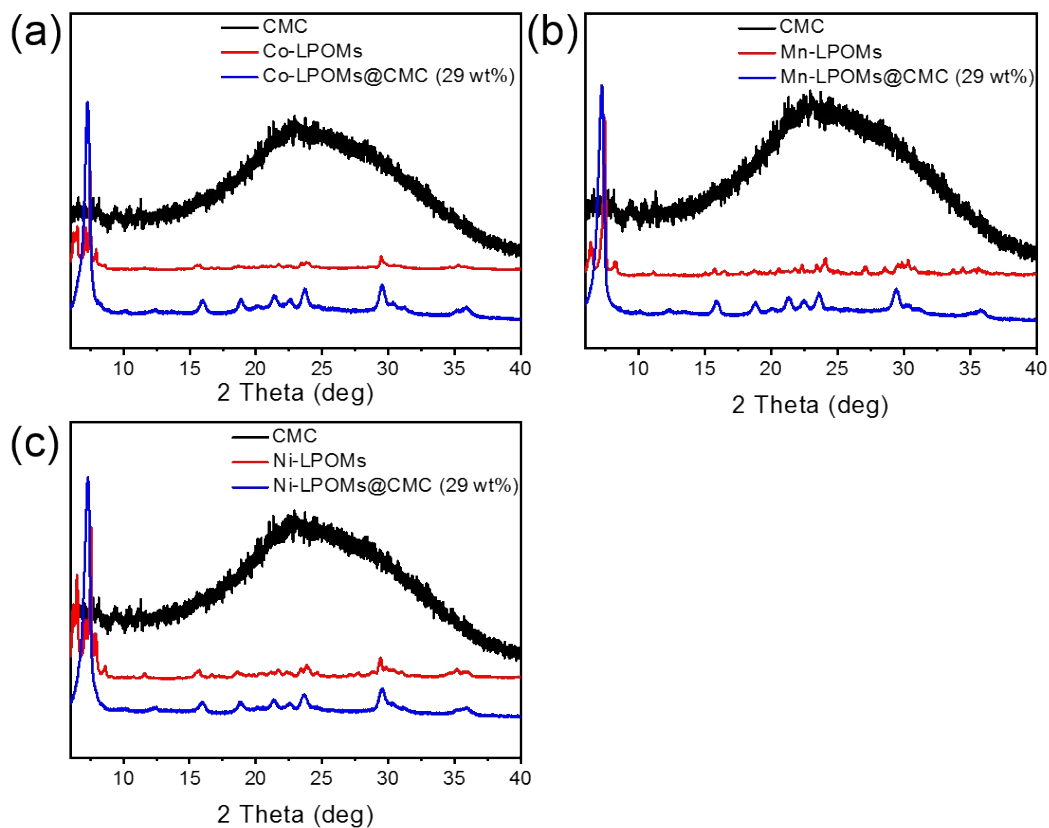

**Figure S8.** PXRD patterns of TM-LPOMs@CMC (TM = Co, Mn and Ni). (a) PXRD patterns of CMC, Co-LPOMs and Co-LPOMs@CMC (29 wt%). (b) PXRD patterns of CMC, Mn-LPOMs and Mn-LPOMs@CMC (29 wt%). (c) PXRD patterns of CMC, Ni-LPOMs and Ni-LPOMs@CMC (29 wt%).

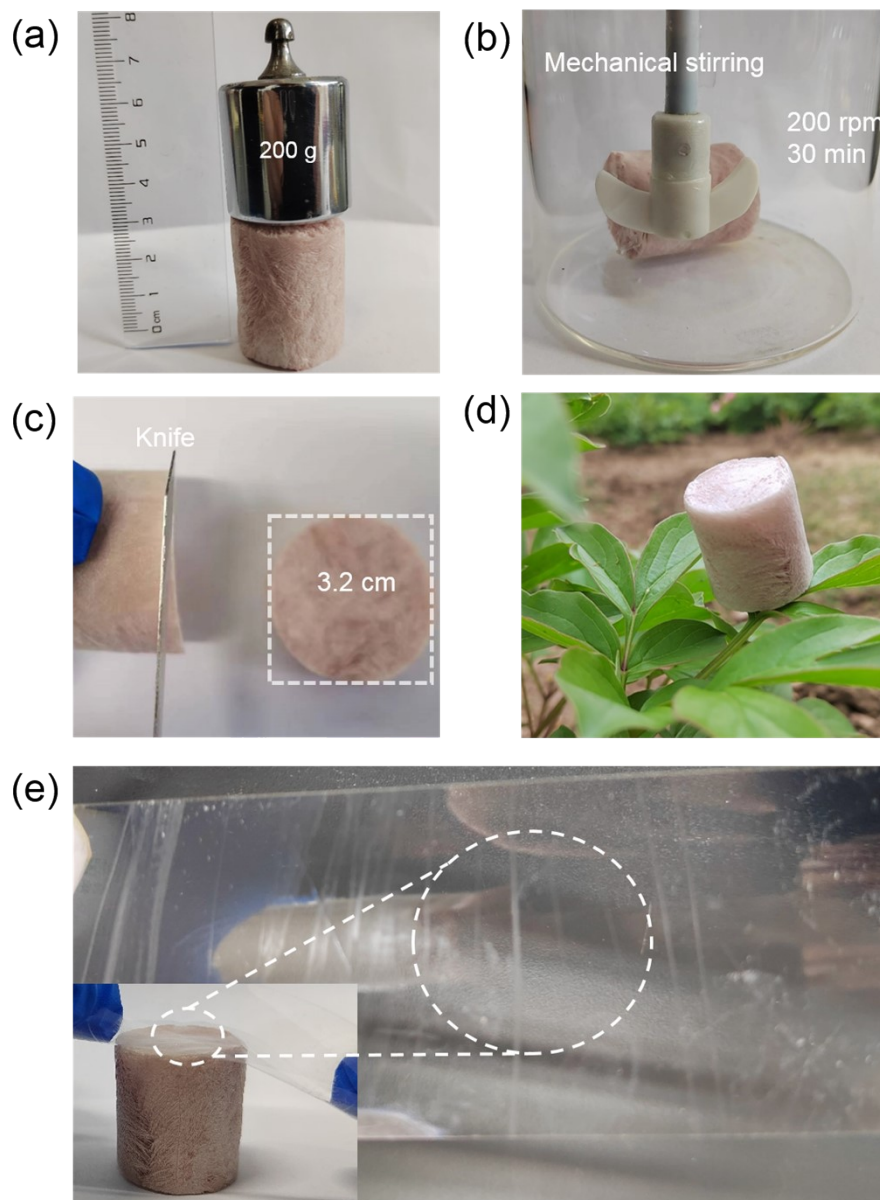

**Figure S9.** Physical properties of Co-LPOMs@CMC (29 wt%). (a) The photo image of the pressing experiment. (b) Mechanical stability test of the foam. (c) The photo image of using a knife to cut the foam into a fixed shape. (d) The photograph of the foam material standing on a leaf. (e) The photo image of the foam after the scotch tape stick-and-peel test.

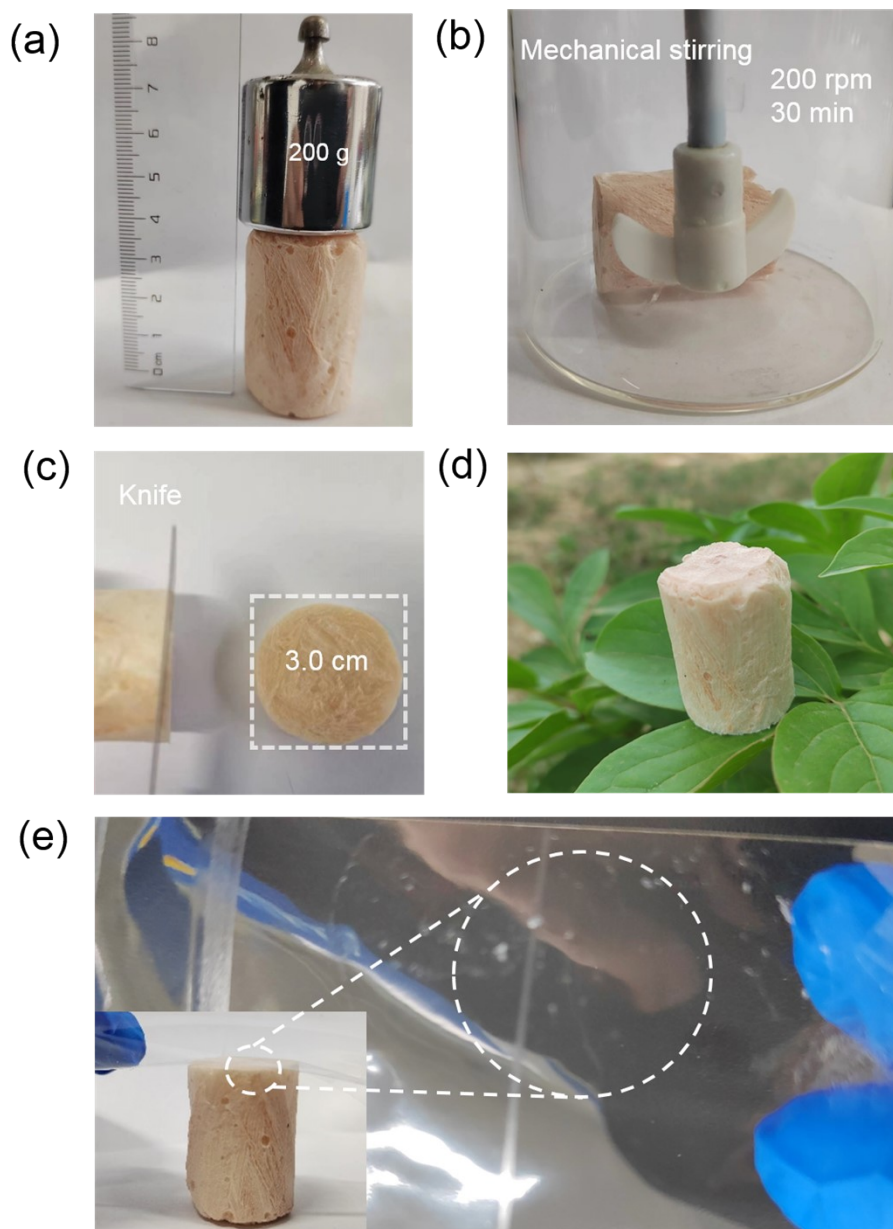

**Figure S10.** Physical properties of Mn-LPOMs@CMC (29 wt%). (a) The photo image of the pressing experiment. (b) Mechanical stability test of the foam. (c) The photo image of using a knife to cut the foam into a fixed shape. (d) The photograph of the foam material standing on a leaf. (e) The photo image of the foam after the scotch tape stick-and-peel test.

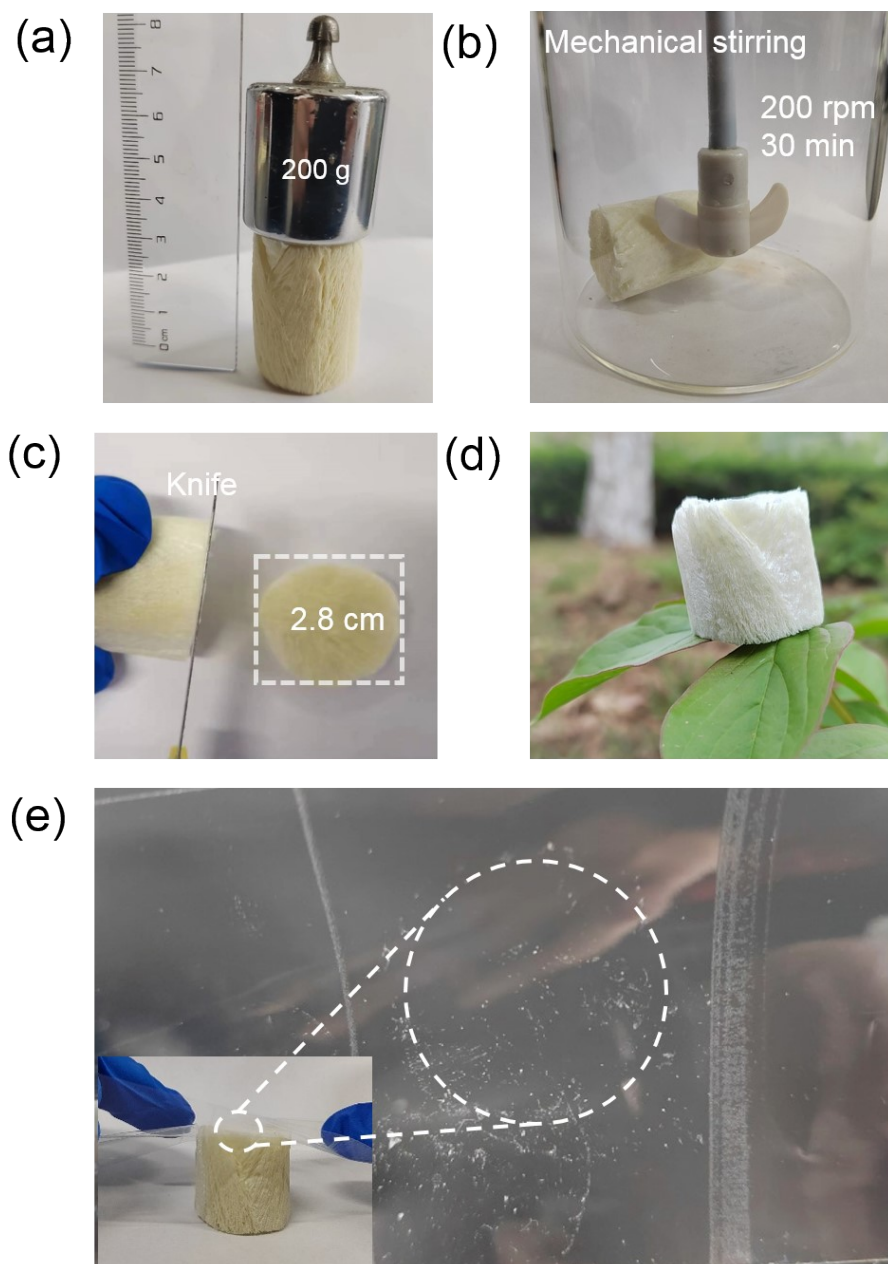

**Figure S11.** Physical properties of Ni-LPOMs@CMC (29 wt%). (a) The photo image of the pressing experiment. (b) Mechanical stability test of the foam. (c) The photo image of using a knife to cut the foam into a fixed shape. (d) The photograph of the foam material standing on a leaf. (e) The photo image of the foam after the scotch tape stick-and-peel test.

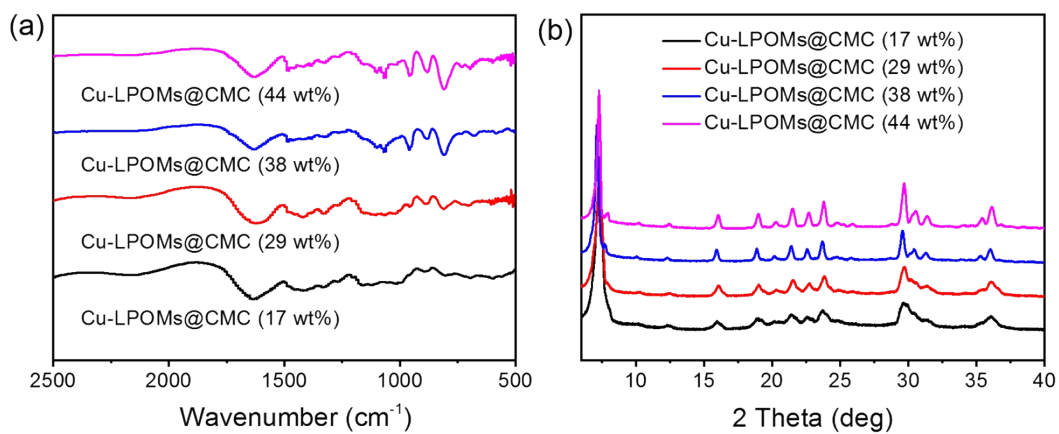

**Figure S12.** FT-IR and PXRD of the Cu-LPOMs@CMC foams with various Cu-LPOMs loadings. (a) FT-IR spectrum of Cu-LPOMs@CMC. (b) PXRD patterns of Cu-LPOMs@CMC.

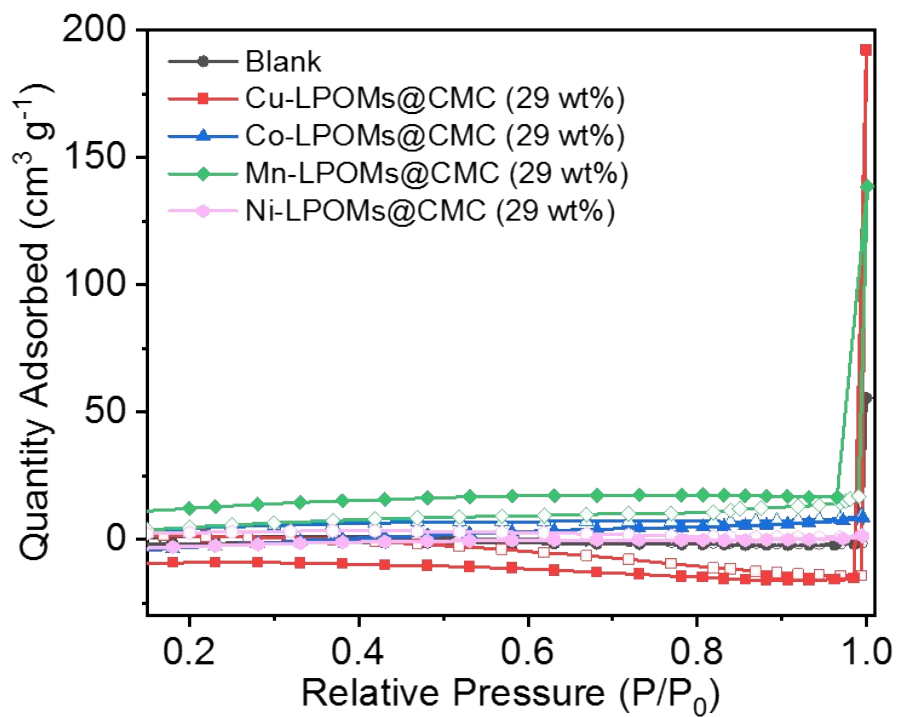

**Figure S13.** N<sub>2</sub> adsorption and desorption isotherms for CMC and TM-LPOMs@CMC (29 wt%) measured at 77 K.

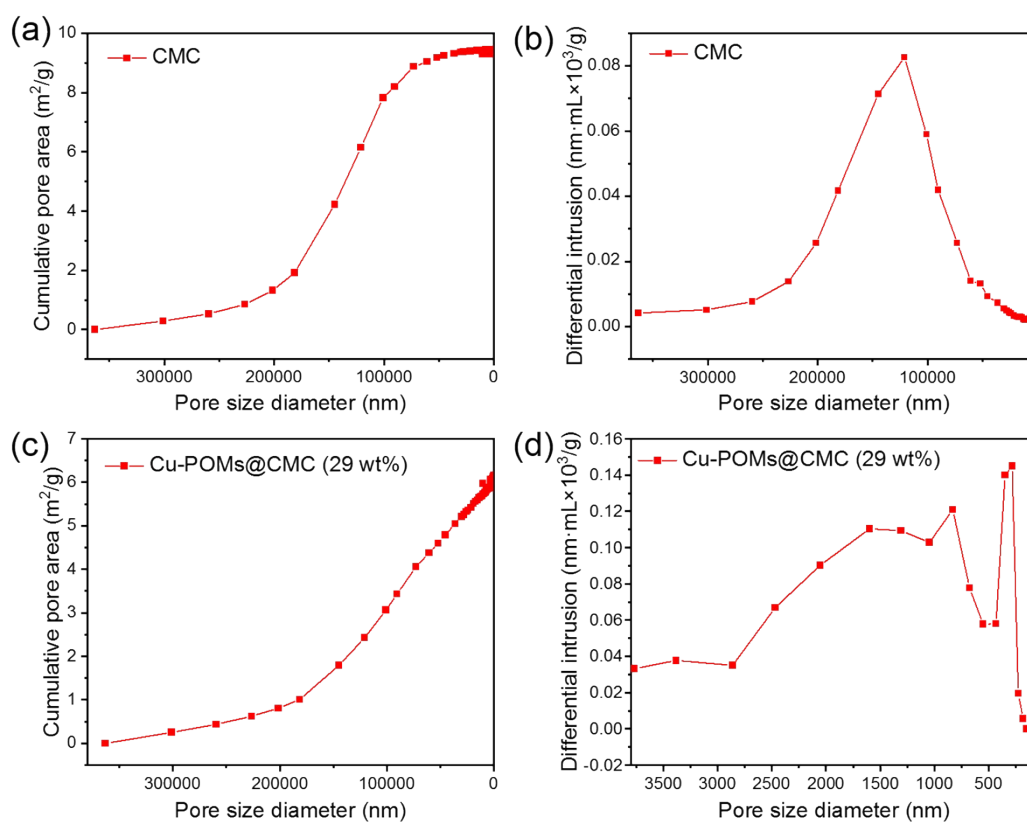

**Figure S14.** The Mercury intrusion porosimetry (MIP) curves of CMC and Cu-POMs@CMC (29 wt%). (a) Cumulative pore area vs pore size curves of CMC foam. (b) Differential intrusion vs pore size curves of CMC foam. (c) Cumulative pore area vs pore size curves of Cu-POMs@CMC (29 wt%) foam. (d) Differential intrusion vs pore size curves of Cu-POMs@CMC (29 wt%) foam.



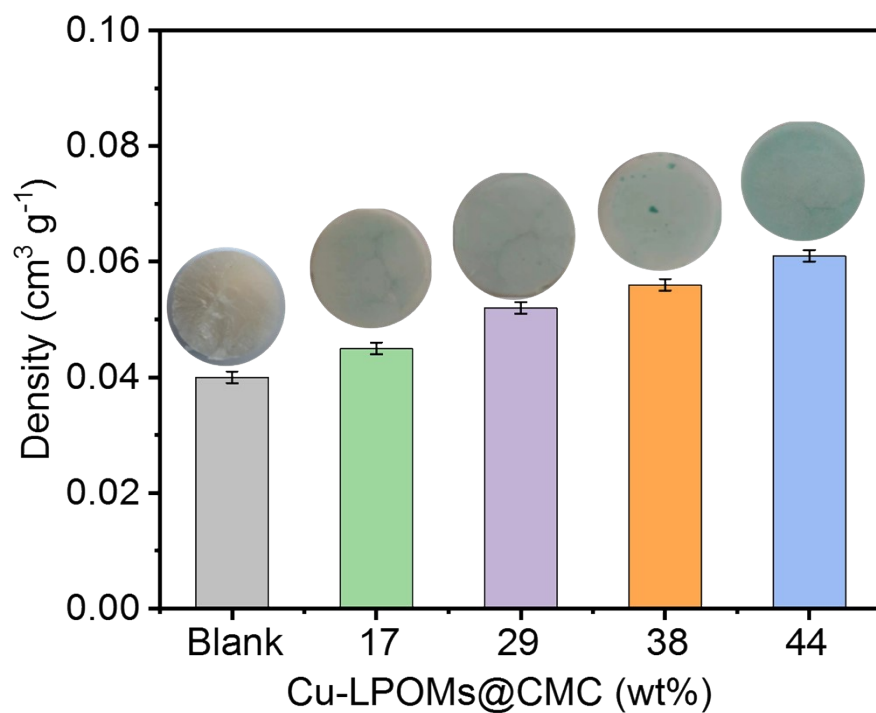

**Figure S15.** Photo images and densities of the Cu-LPOMs@CMC foams with various Cu-LPOMs loadings. The density test was conducted by Archimedes law and calculated the weight. All the experiments were conducted in triplicate.

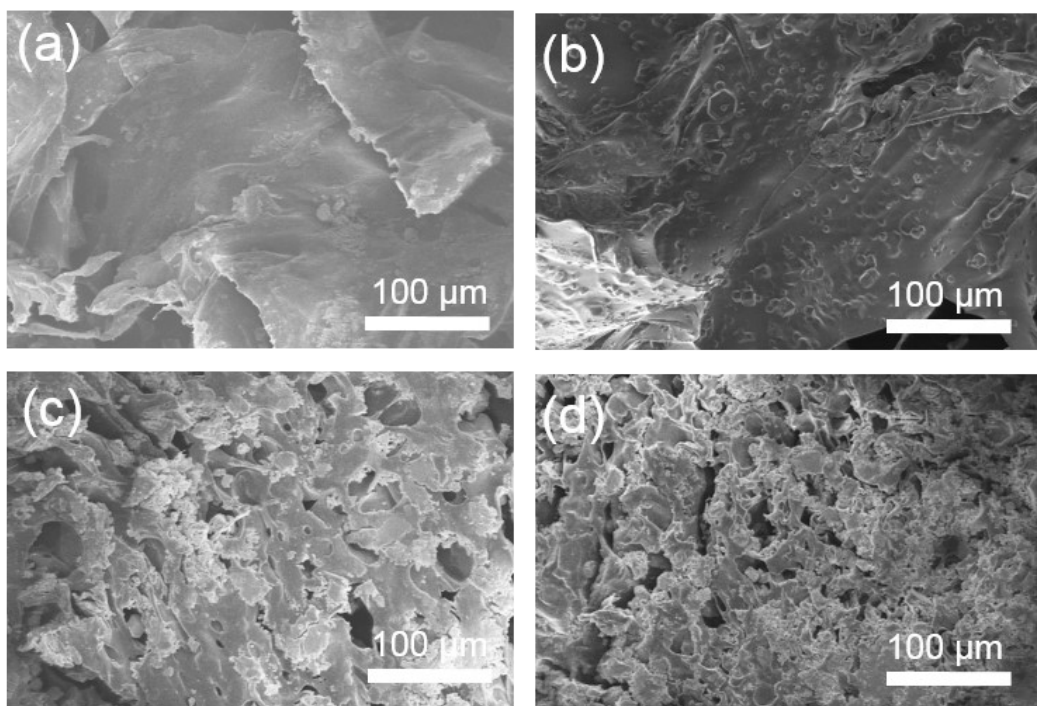

**Figure S16.** SEM images of the Cu-LPOMs@CMC foams with various Cu-LPOMs loadings. (a) Cu-LPOMs@CMC (17 wt%). (b) Cu-LPOMs@CMC (29 wt%). (c) Cu-LPOMs@CMC (38 wt%). (d) Cu-LPOMs@CMC (44 wt%).

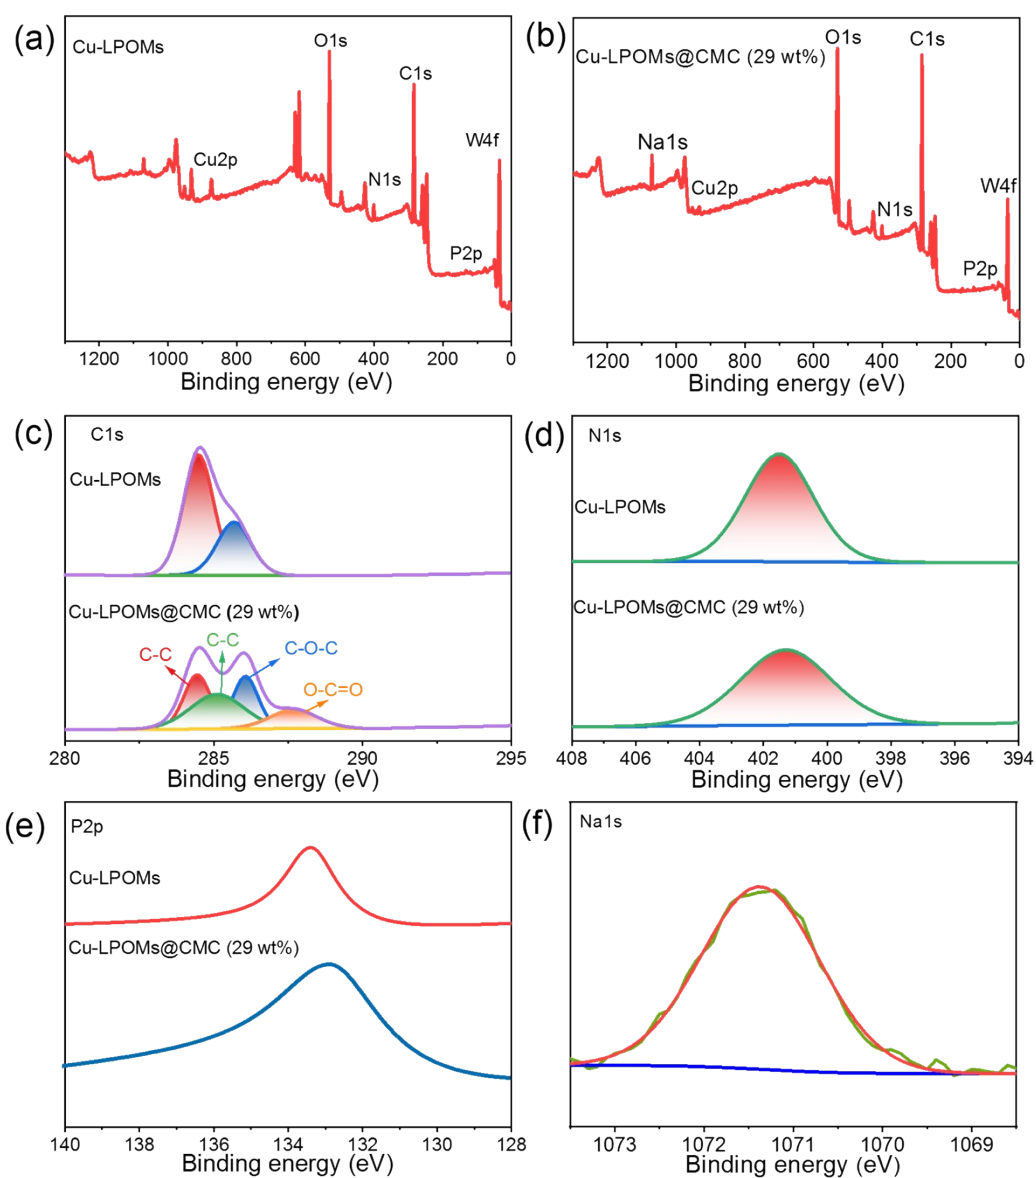

**Figure S17.** XPS spectrum of Cu-LPOMs and Cu-LPOMs@CMC (29 wt%). (a) Total XPS spectrum of Cu-LPOMs. (b) Total XPS spectrum of Cu-LPOMs@CMC (29 wt%). (c) XPS spectrum of C1s for Cu-LPOMs and Cu-LPOMs@CMC (29 wt%). (d) XPS spectrum of N1s for Cu-LPOMs and Cu-LPOMs@CMC (29 wt%). (e) XPS spectrum of P2p for Cu-LPOMs and Cu-LPOMs@CMC (29 wt%). (f) XPS spectrum of Na1s for Cu-LPOMs@CMC (29 wt%).

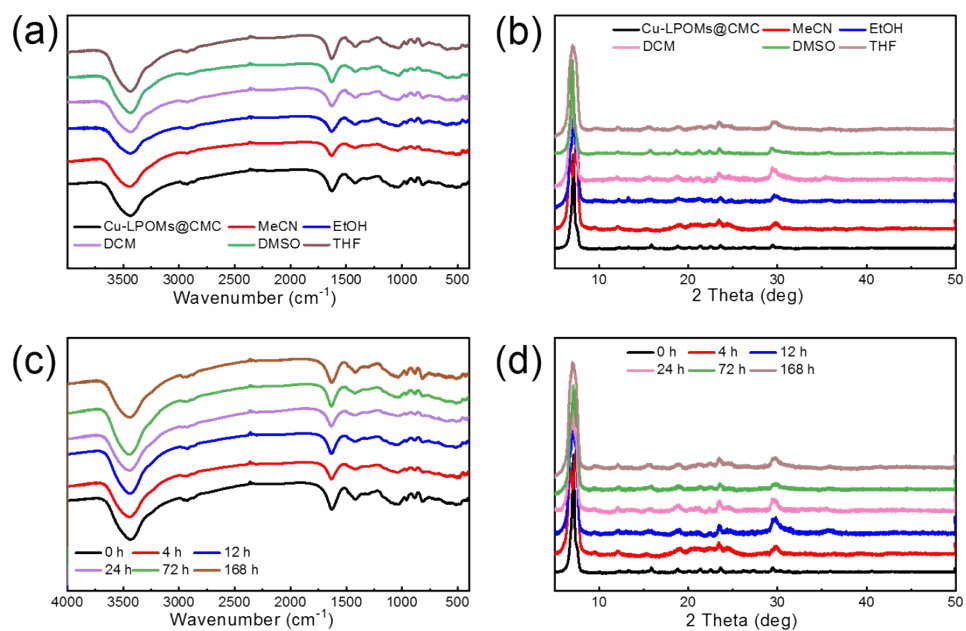

**Figure S18.** Stability test of Cu-LPOMs@CMC (29 wt%). (a) FT-IR spectra and (b) PXRD patterns of from leaching test of Cu-LPOMs@CMC (29 wt%) immersed in various solution. (c) FT-IR spectra and (d) PXRD patterns of Cu-LPOMs@CMC (29 wt%) immersed in the acetonitrile reaction solution for various time.

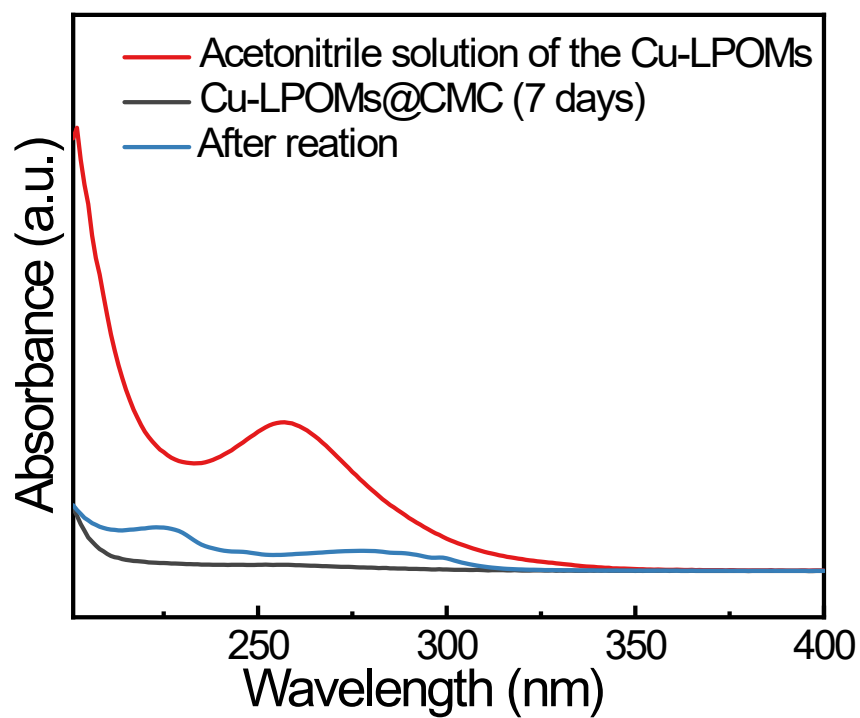

**Figure S19.** UV absorption spectra of the acetonitrile solution after immersing Cu-LPOMs@CMC (29 wt%) in it for 7 days and the Cu-LPOMs@CMC (29 wt%) after reaction.

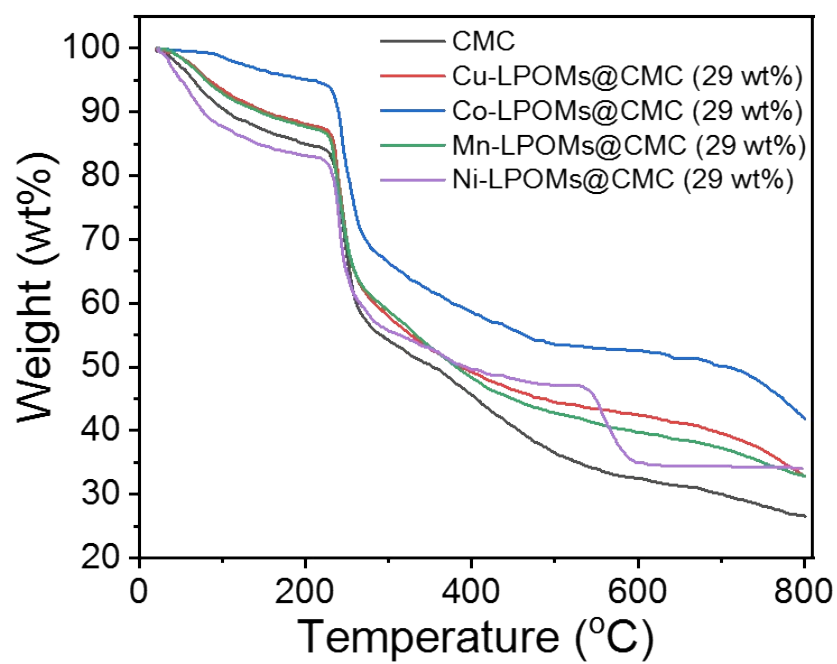

**Figure S20.** Thermogravimetric analysis (TGA) of CMC and TM-LPOMs@CMC (29 wt%).

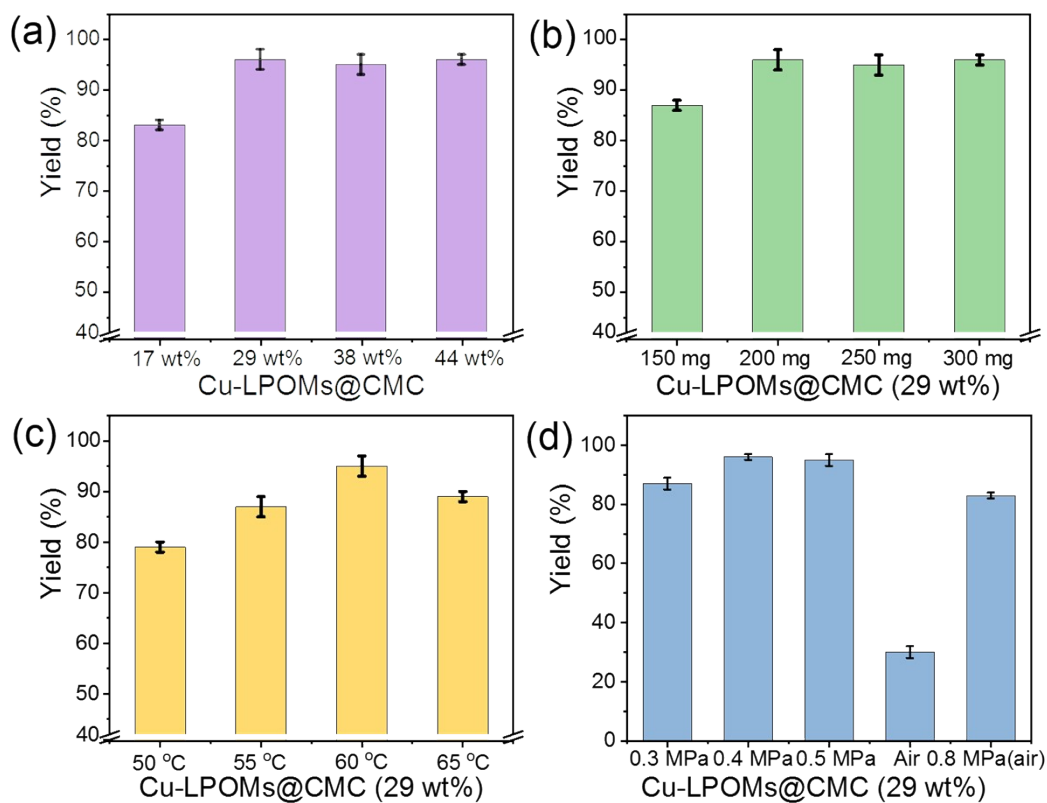

**Figure S21.** Optimization of the reaction conditions. (a) The effect of Cu-LPOMs@CMC foams with various Cu-LPOMs loadings on the model reaction. (b) The effect of Cu-LPOMs@CMC (29 wt%) mass on the model reaction. (c) The effect of different temperature on the model reaction. (d) The effect of different pressure on the model reaction.

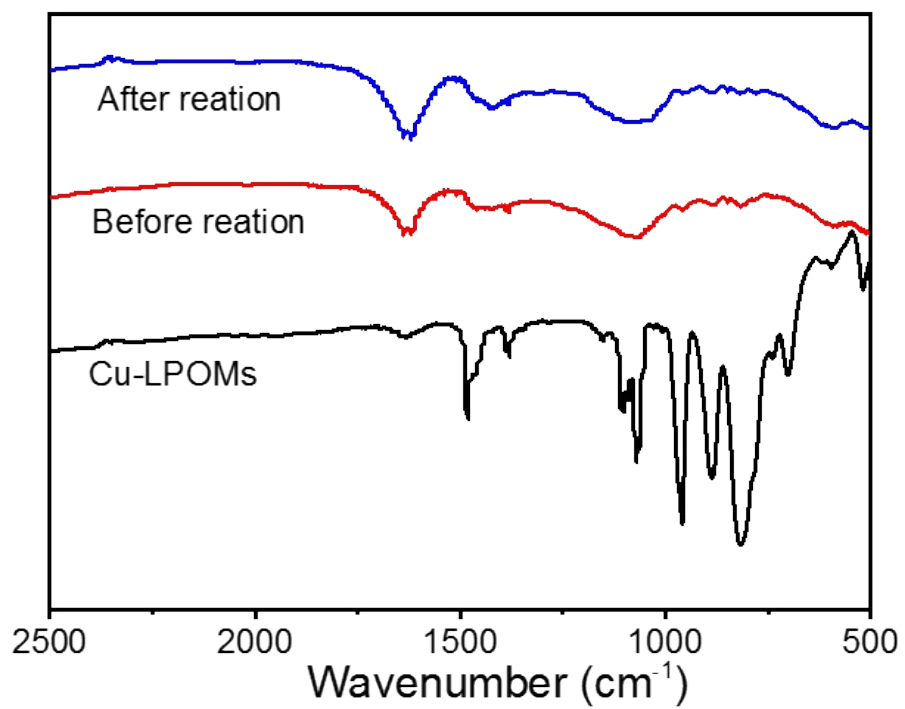

**Figure S22.** FT-IR spectra of Cu-LPOMs@CMC (29 wt%) before and after reactions.



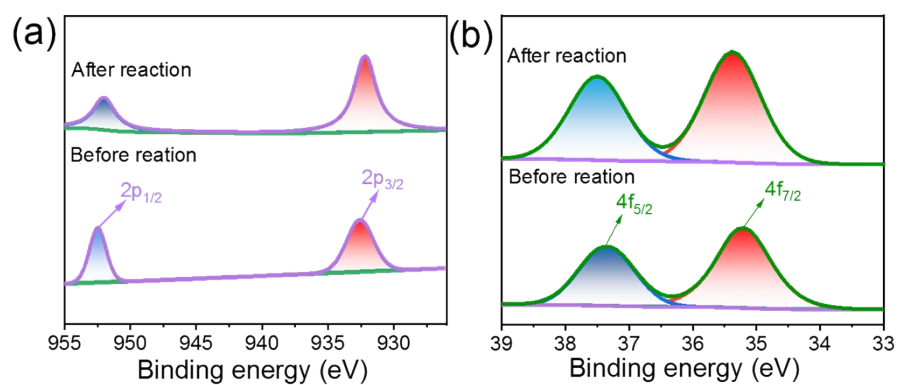

**Figure S23.** XPS spectra of Cu-LPOMs@CMC (29 wt%), (a) Cu2p and (b) W4f of before and after the reaction.

### <sup>1</sup>H NMR spectra of 2, 2'-dibenzothiazoledisulfide

<sup>1</sup>H NMR (500 MHz, CDCl<sub>3</sub>) δ: 7.87 (d, *J* = 8.2 Hz, 2H), 7.70 (d, *J* = 8.0 Hz, 2H), 7.39 (t, *J* = 8.3 Hz, 2H), 7.29 (t, *J* = 8.1 Hz, 2H).

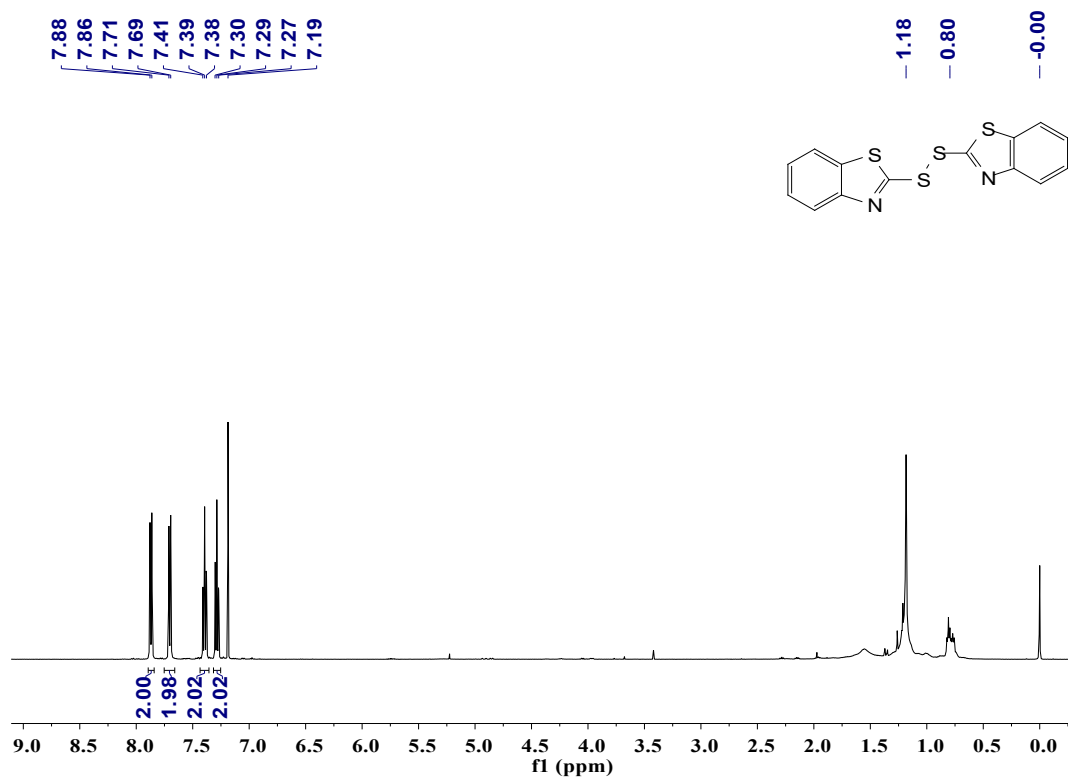

Figure S24. <sup>1</sup>H NMR spectra of intermediate 2, 2'-dibenzothiazoledisulfide.

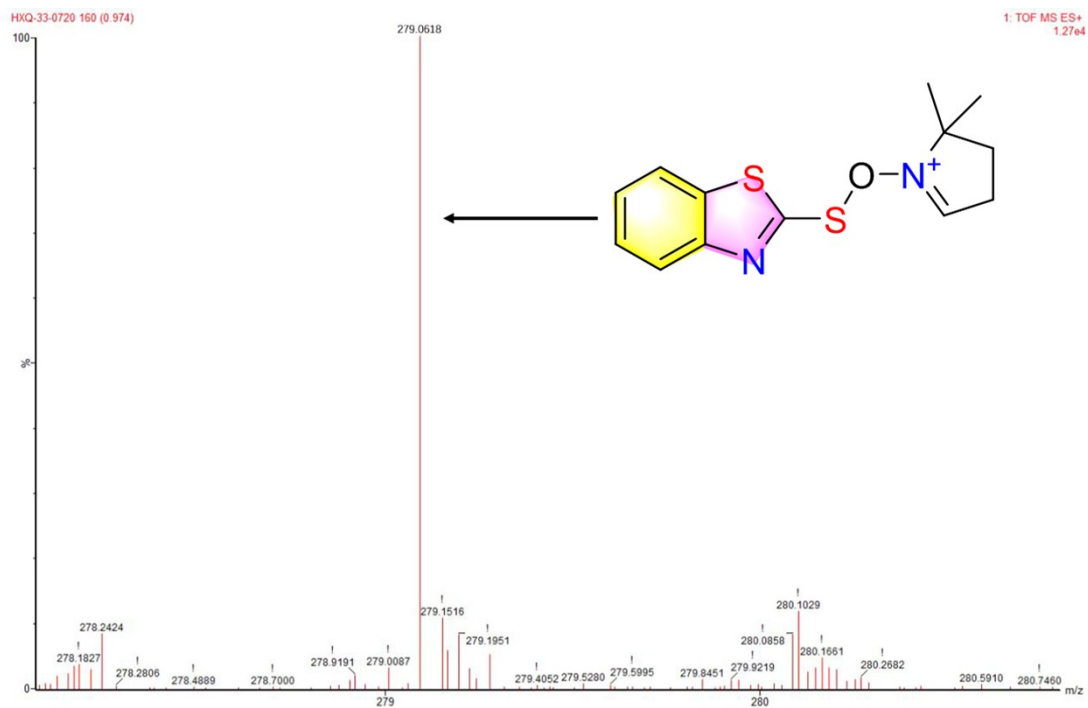

**Figure S25.** HRMS analysis of the adduct of thiol radical and DMPO.

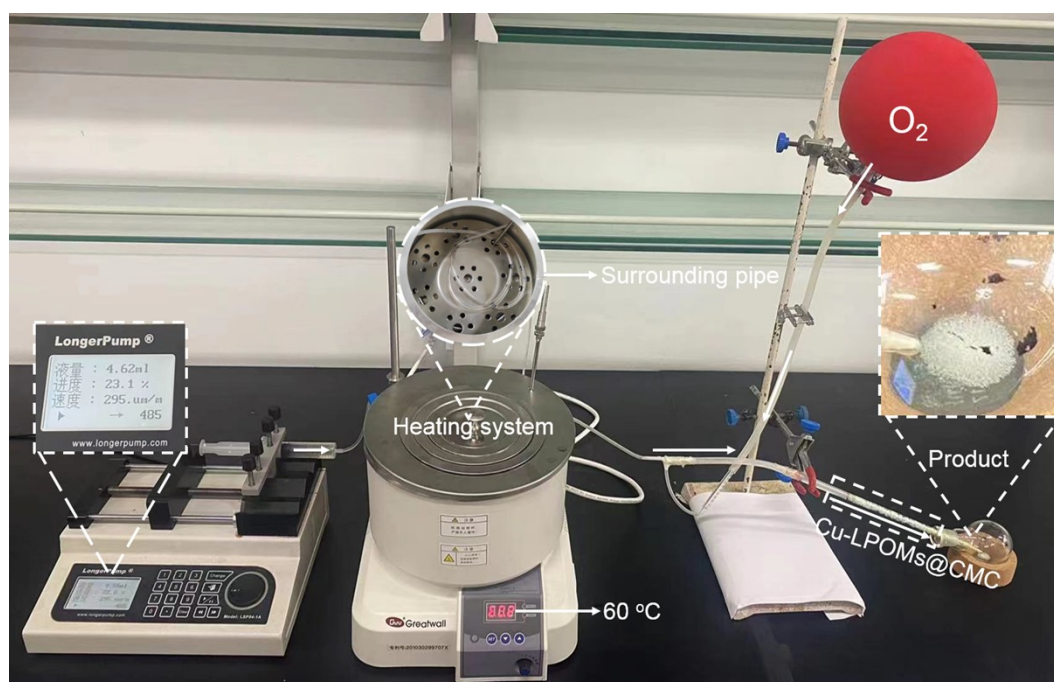

**Figure S26.** Schematic illustration of the flowing catalysis using the Cu-LPOM@CMC (29 wt%) as the catalyst (production rate, ~430 mg/h in a batch-experiment).

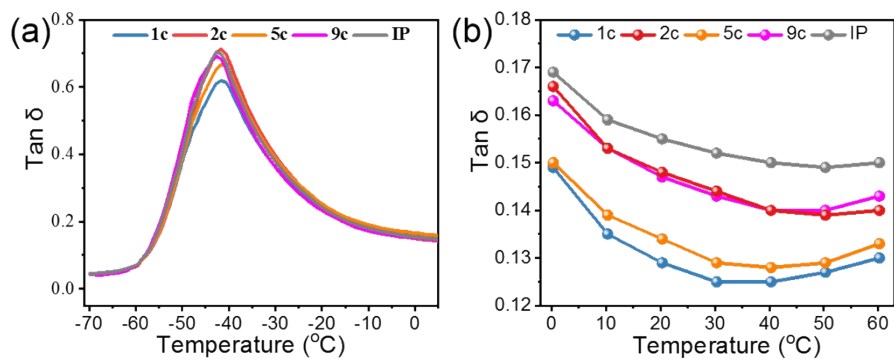

**Figure S27.** Dynamic mechanical analysis of sulfenamides rubber additives. (a) Dynamic mechanical analysis of fiver sulfenamides rubber additives. (b) Dynamic mechanical analysis from 0 to 60  $^{\circ}\text{C}$ .

**Table S1. Optimization of reaction conditions.**

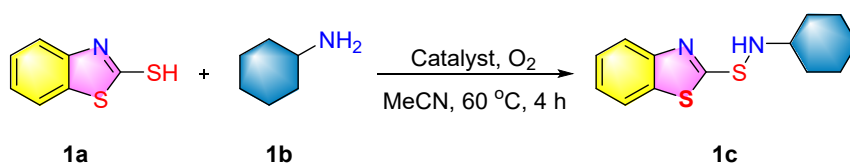

| Entry <sup>a</sup> | Catalysts                                                         | Yield (%) <sup>c</sup> |
|--------------------|-------------------------------------------------------------------|------------------------|
| 1                  | No                                                                | -                      |
| 2                  | TBA <sub>4</sub> -H <sub>3</sub> PW <sub>11</sub> O <sub>39</sub> | -                      |
| 3                  | CuCl <sub>2</sub>                                                 | 19                     |
| 4                  | TBA <sub>4</sub> -HPW <sub>11</sub> CuO <sub>39</sub>             | 82                     |
| 5 <sup>b</sup>     | TBA <sub>4</sub> -HPW <sub>11</sub> CuO <sub>39</sub>             | 38                     |
| 6                  | TBA <sub>4</sub> -HPW <sub>11</sub> MnO <sub>39</sub>             | -                      |
| 7                  | TBA <sub>4</sub> -HPW <sub>11</sub> NiO <sub>39</sub>             | -                      |
| 8                  | TBA <sub>4</sub> -HPW <sub>11</sub> CoO <sub>39</sub>             | -                      |
| 9                  | CMC                                                               | -                      |
| 10                 | Cu-LPOMs@CMC (17 wt%)                                             | 83                     |
| 11                 | Cu-LPOMs@CMC (29 wt%)                                             | 96                     |
| 12                 | Cu-LPOMs@CMC (38 wt%)                                             | 95                     |
| 13                 | Cu-LPOMs@CMC (44 wt%)                                             | 96                     |

<sup>a</sup> Reaction conditions: **1a** (1 mmol), **1b** (4 mmol), catalyst (200 mg), 60 °C, 0.4 MPa, 4 h, 10 mL MeCN. <sup>b</sup> Catalyst (80 mg). <sup>c</sup> Isolated yields.

**Table S2. Analysis of test parameter data of sulfenamides rubber additives.**

| Test items                     | 1c <sup>a</sup> | 2c <sup>a</sup> | 5c <sup>a</sup> | 9c <sup>a</sup> | IP <sup>b</sup> |
|--------------------------------|-----------------|-----------------|-----------------|-----------------|-----------------|
| Mooney Viscosity (VM)          | 47.7            | 38.8            | 47.3            | 47.0            | 44.7            |
| Scorch t5 time (min)           | 18.1            | 8.2             | 16.1            | 12.8            | 17.7            |
| MH (dNm)                       | 15.48           | 14.01           | 14.96           | 10.15           | 14.47           |
| ML (dNm)                       | 1.80            | 1.32            | 1.61            | 1.61            | 1.68            |
| TS2 (sec)                      | 283             | 126             | 269             | 158             | 274             |
| Tc10 (sec)                     | 252             | 108             | 235             | 89              | 250             |
| Tc50 (sec)                     | 374             | 203             | 368             | 254             | 348             |
| Tc90 (sec)                     | 662             | 484             | 647             | 582             | 593             |
| Tc95 (sec)                     | 816             | 608             | 769             | 696             | 706             |
| Tc90-Tc10 (sec)                | 410             | 376             | 412             | 493             | 343             |
| MH-ML (dNm)                    | 13.68           | 12.69           | 13.35           | 8.54            | 12.79           |
| Solidity (Shao A°)             | 75              | 73              | 77              | 71              | 76              |
| Initial height (mm)            | 25.10           | 25.30           | 25.10           | 25.60           | 25.30           |
| Deformation (mm)               | 3.0             | 4.0             | 3.9             | 4.2             | 4.5             |
| Permanent deformation rate (%) | 12.0            | 15.8            | 15.5            | 16.4            | 17.8            |
| Internal temperature rise (°C) | 41.6            | 50.4            | 55.2            | 47.3            | 57.8            |

<sup>a</sup> Laboratory preparation. <sup>b</sup> Industrial products (pre-dispersed master batch CBS-80).

**Table S3. Oxidative synthesis of sulfonamide rubber additives by different catalyst.**

| Entry | Catalysts                                 | Yeild | Ref.      |
|-------|-------------------------------------------|-------|-----------|
| 1     | Cu-LPOMs@CMC (29 wt%)                     | 96    | This work |
| 2     | TEMPO                                     | 88    | 1         |
| 3     | Co(phcy)(SO <sub>3</sub> Na) <sub>4</sub> | 90    | 2         |
| 4     | NaOH, NaOCl                               | 77    | 3         |
| 5     | Cu(CH <sub>3</sub> COO) <sub>2</sub>      | 87    | 4         |
| 6     | NaClO/H <sub>2</sub> O <sub>2</sub>       | 87    | 5         |

TEMPO: 2,2,6,6-tetramethylpiperidine-N-oxyl.



### N-cyclohexyl-2-benzothiazolesulfenamide (1c).

White solid (96% yield), mp: 94-96 °C;  $^1\text{H}$  NMR (500 MHz,  $\text{CDCl}_3$ )  $\delta$ : 7.80 (dd,  $J = 11.7, 8.0$  Hz, 2H), 7.39 (t,  $J = 7.6$  Hz, 1H), 7.28 – 7.24 (m, 2H), 3.25 (d,  $J = 5.7$  Hz, 1H), 2.93 – 2.87 (m, 1H), 2.09 (d,  $J = 10.7$  Hz, 2H), 1.77 (dd,  $J = 13.1, 3.7$  Hz, 2H), 1.62 (d,  $J = 13.1$  Hz, 1H), 1.26 (q,  $J = 11.8$  Hz, 5H);  $^{13}\text{C}$  NMR (125 MHz,  $\text{CDCl}_3$ )  $\delta$ : 135.0, 125.8, 123.5, 121.5, 121.0, 60.3, 33.7, 25.6, 24.9.

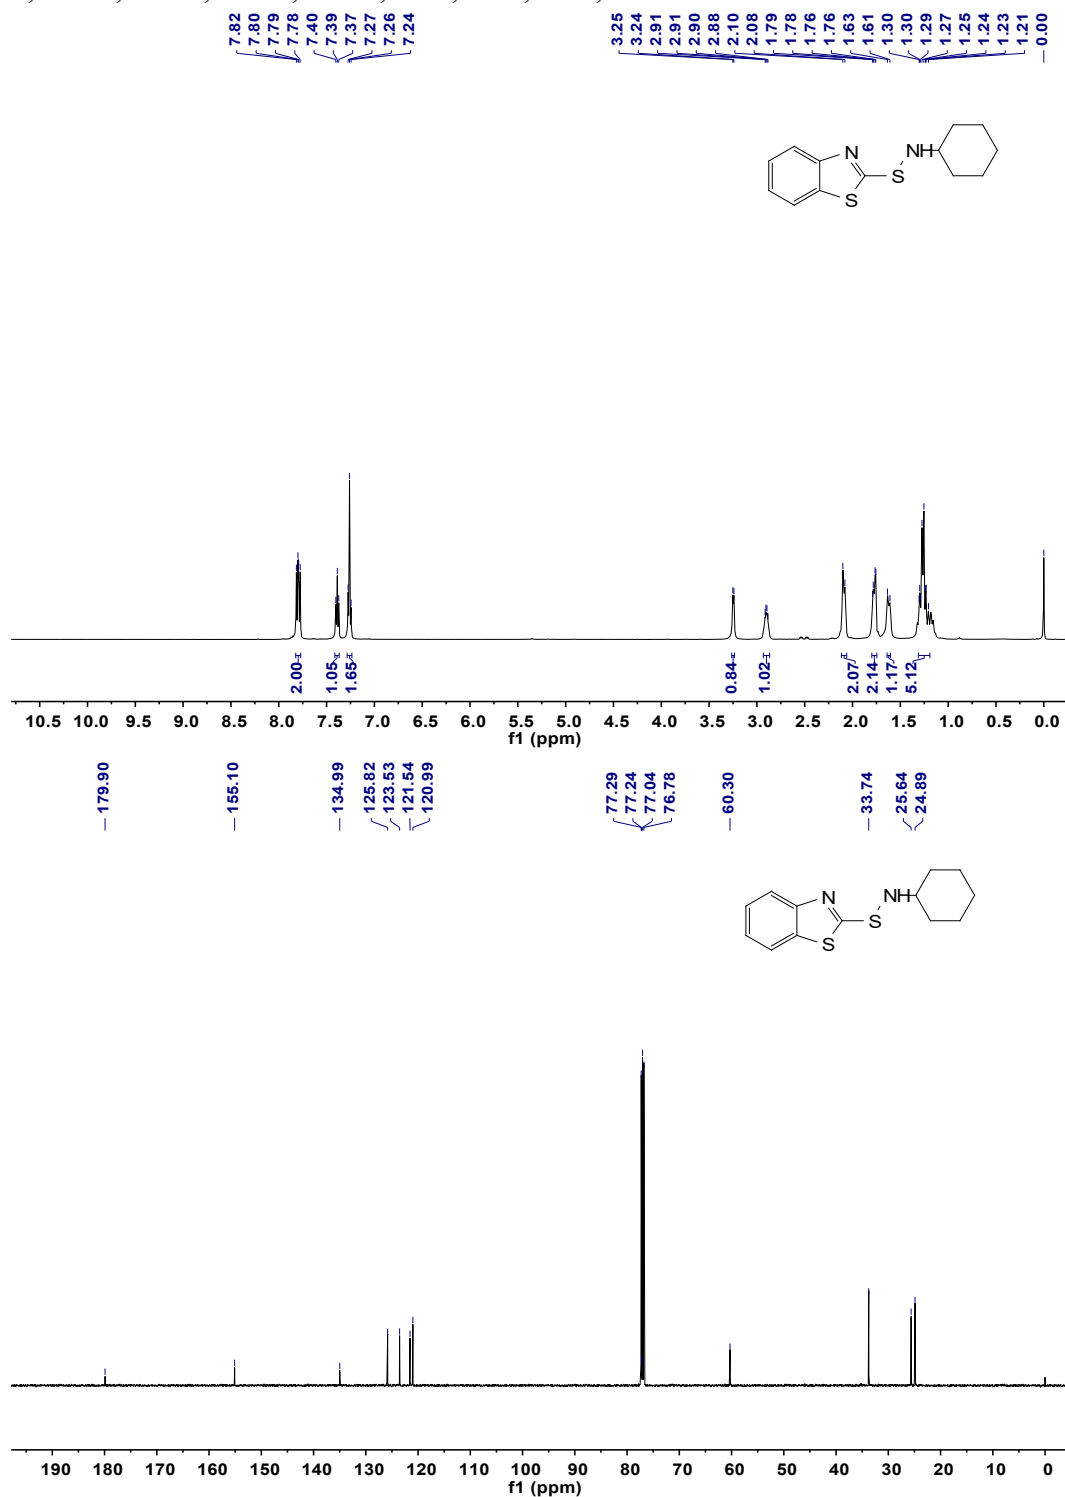

Figure S28.  $^1\text{H}$  NMR and  $^{13}\text{C}$  NMR spectra of compound 1c.

### N-(phenylmethyl)-2-Benzothiazolesulfenamide (2c)

White solid (63% yield), mp: 116-117 °C;  $^1\text{H}$  NMR (500 MHz,  $\text{CDCl}_3$ )  $\delta$ : 7.84 (dd,  $J = 13.0, 8.0$  Hz, 2H), 7.44 – 7.37 (m, 5H), 7.33 – 7.28 (m, 2H), 4.29 (d,  $J = 5.9$  Hz, 2H), 3.55 (s, 1H);  $^{13}\text{C}$  NMR (125 MHz,  $\text{CDCl}_3$ )  $\delta$ : 138.5, 128.7, 128.5, 128.0, 126.0, 123.8, 121.7, 121.1, 57.1.

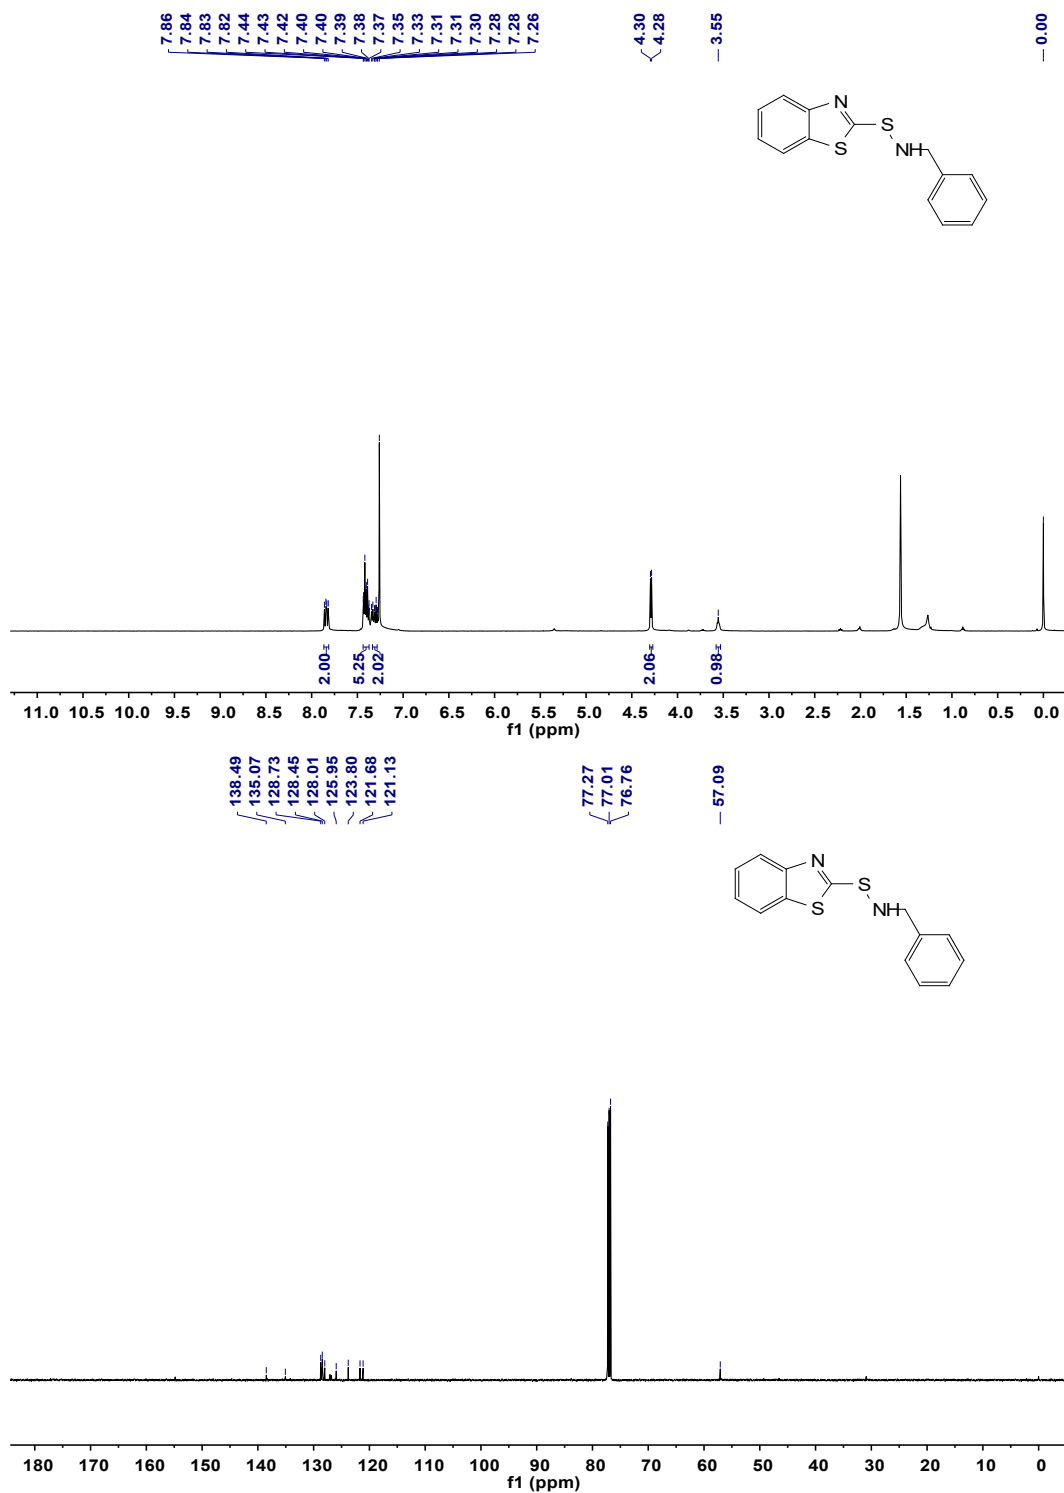

Figure S29.  $^1\text{H}$  NMR and  $^{13}\text{C}$  NMR spectra of compound 2c.

**N-[(4-chlorophenyl)methyl]-2-benzothiazolesulfenamide (3c).**

$^1\text{H}$  NMR (500 MHz,  $\text{CDCl}_3$ )  $\delta$ : 7.84 (dd,  $J = 15.7, 8.0$  Hz, 2H), 7.42 (td,  $J = 7.8, 7.3, 1.2$  Hz, 1H), 7.35 (s, 4H), 7.32 – 7.28 (m, 1H), 4.26 (d,  $J = 5.8$  Hz, 2H), 3.59 (t,  $J = 5.9$  Hz, 1H);  $^{13}\text{C}$  NMR (125 MHz,  $\text{CDCl}_3$ )  $\delta$ : 154.7, 136.9, 135.0, 133.9, 129.9, 128.9, 126.0, 123.9, 121.7, 121.2, 56.2.

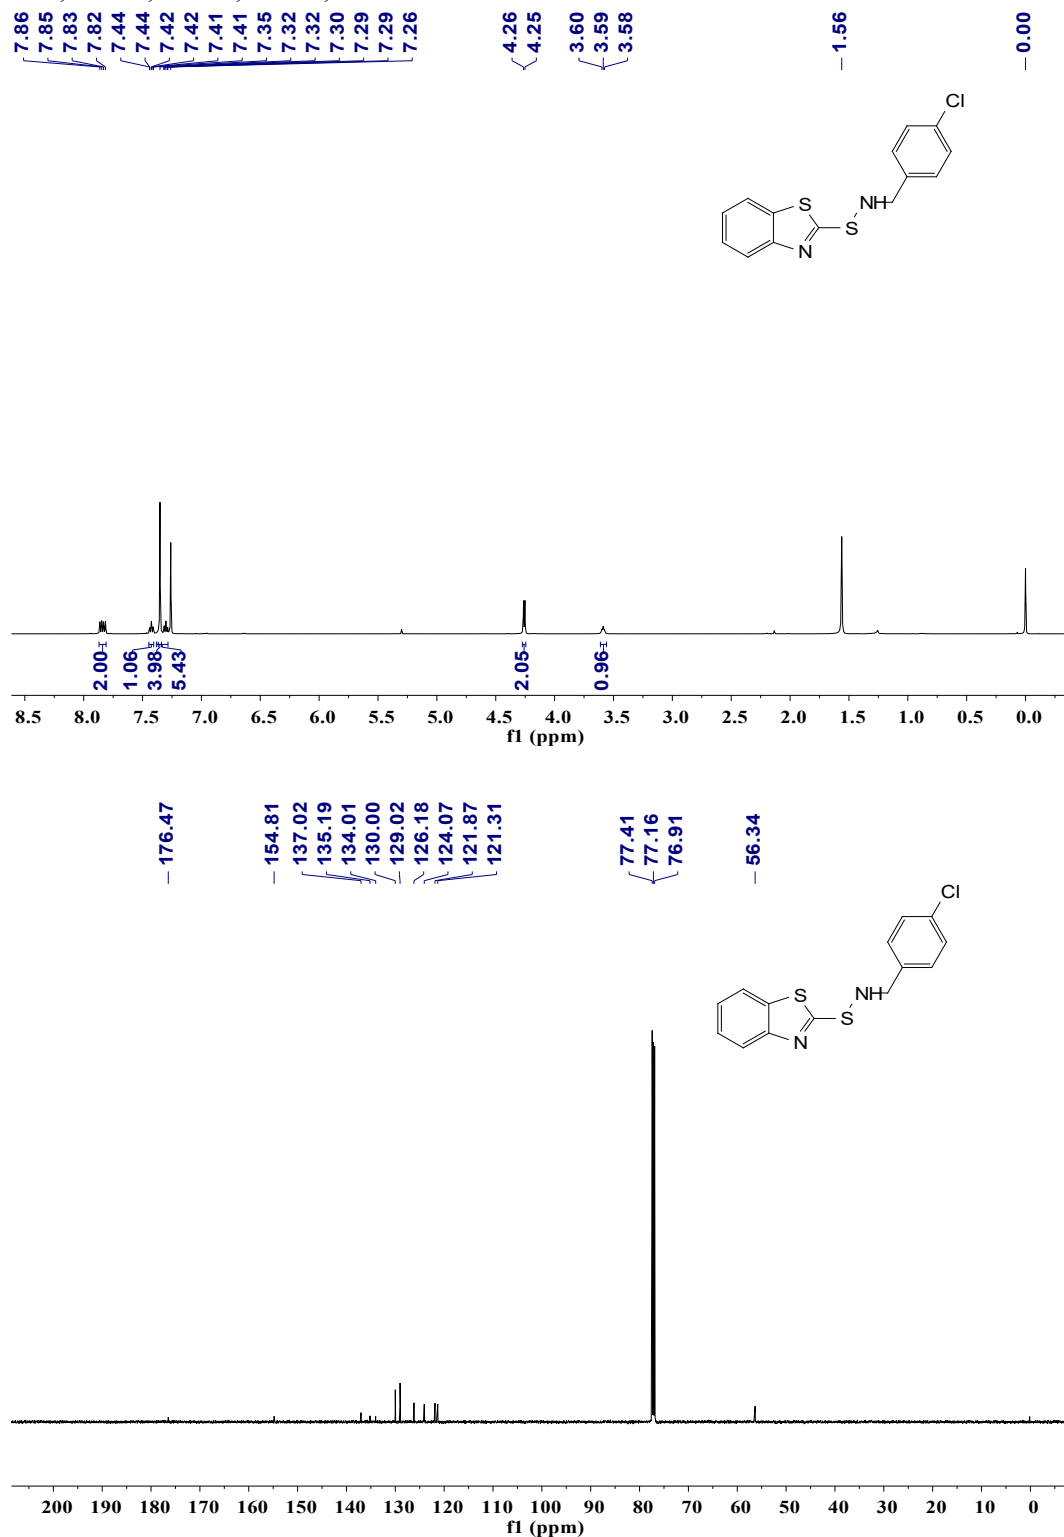

**Figure S30.**  $^1\text{H}$  NMR and  $^{13}\text{C}$  NMR spectra for compound **3c**.

### N-[(4-bromophenyl)methyl]-2-Benzothiazolesulfenamide (4c)

White solid (58% yield), mp: 116-120 °C;  $^1\text{H}$  NMR (500 MHz,  $\text{CDCl}_3$ )  $\delta$ : 7.84 (dd,  $J = 15.7, 8.0$  Hz, 2H), 7.51 (d,  $J = 8.0$  Hz, 2H), 7.43 (d,  $J = 7.5$  Hz, 1H), 7.30 (t,  $J = 7.6$  Hz, 3H), 4.24 (d,  $J = 5.8$  Hz, 2H), 3.59 (t,  $J = 5.9$  Hz, 1H);  $^{13}\text{C}$  NMR (125 MHz,  $\text{CDCl}_3$ )  $\delta$ : 131.8, 130.2, 126.0, 123.9, 121.7, 121.2, 76.8, 56.2.

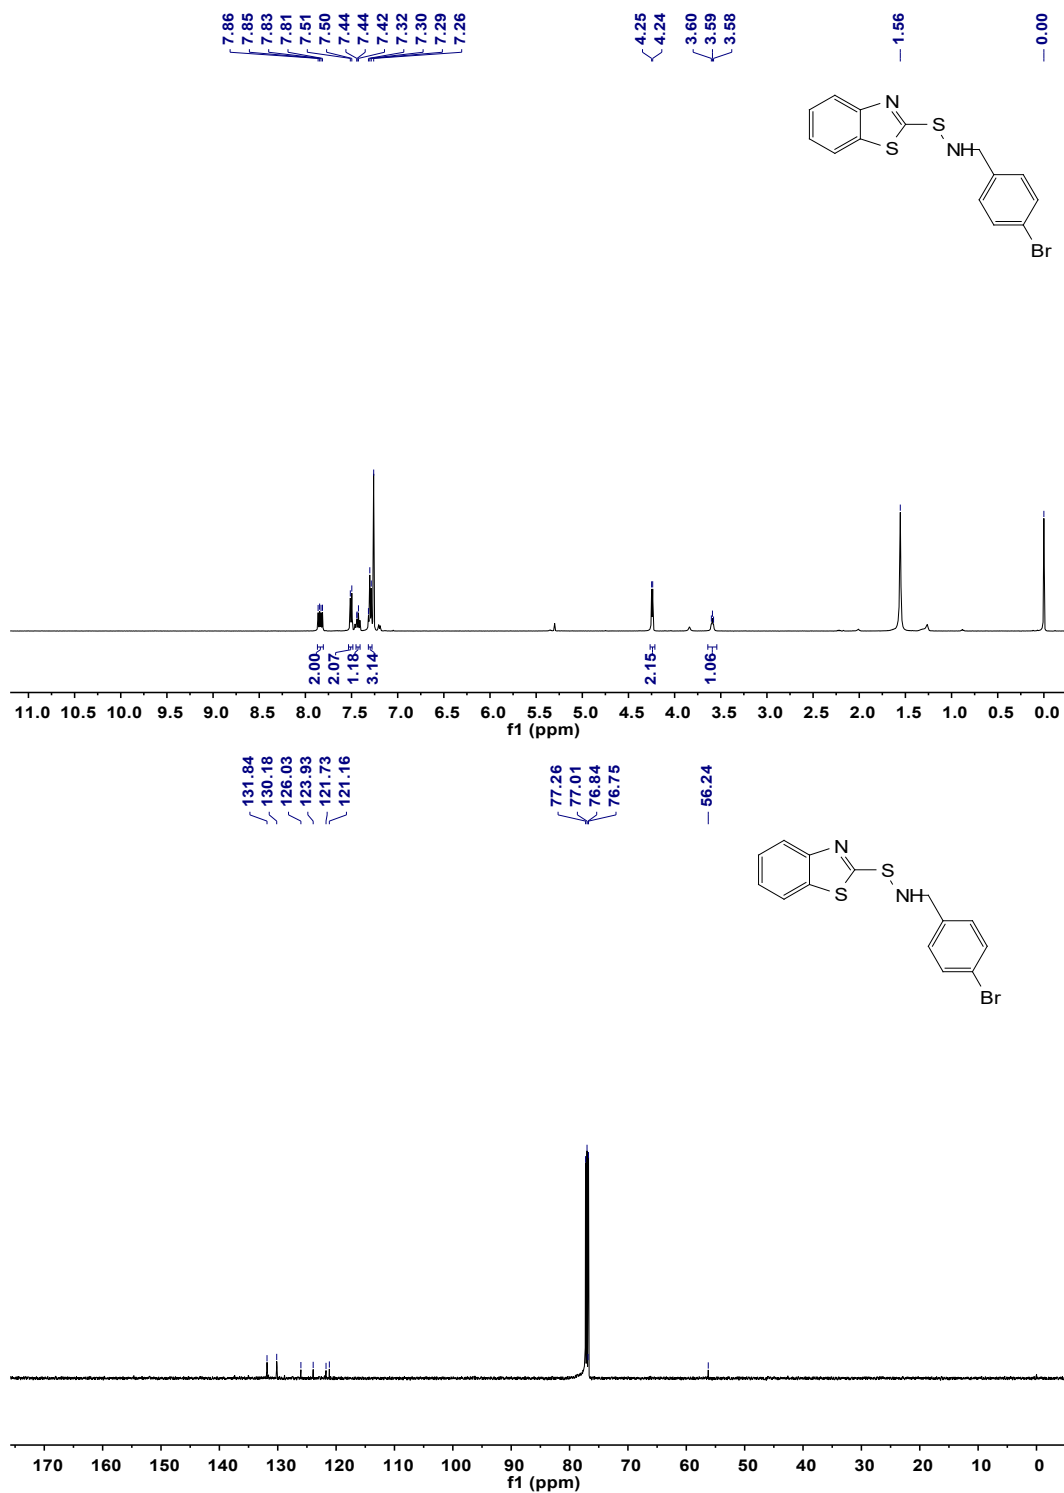

Figure S31.  $^1\text{H}$  NMR and  $^{13}\text{C}$  NMR spectra of compound 4c.

### N-[(4-methylphenyl)methyl]-2-Benzothiazolesulfenamide (5c)

White solid (70% yield), mp: 120-123 °C;  $^1\text{H}$  NMR (500 MHz,  $\text{CDCl}_3$ )  $\delta$ : 7.83 (dd,  $J$  = 12.6, 8.0 Hz, 2H), 7.44 – 7.38 (m, 1H), 7.32 – 7.27 (m, 3H), 7.19 (d,  $J$  = 7.8 Hz, 2H), 4.24 (d,  $J$  = 5.9 Hz, 2H), 3.51 (t,  $J$  = 5.7 Hz, 1H), 2.36 (s, 3H);  $^{13}\text{C}$  NMR (125 MHz,  $\text{CDCl}_3$ )  $\delta$ : 154.9, 137.8, 135.5, 129.4, 128.4, 125.9, 123.8, 121.7, 121.1, 56.8, 21.2.

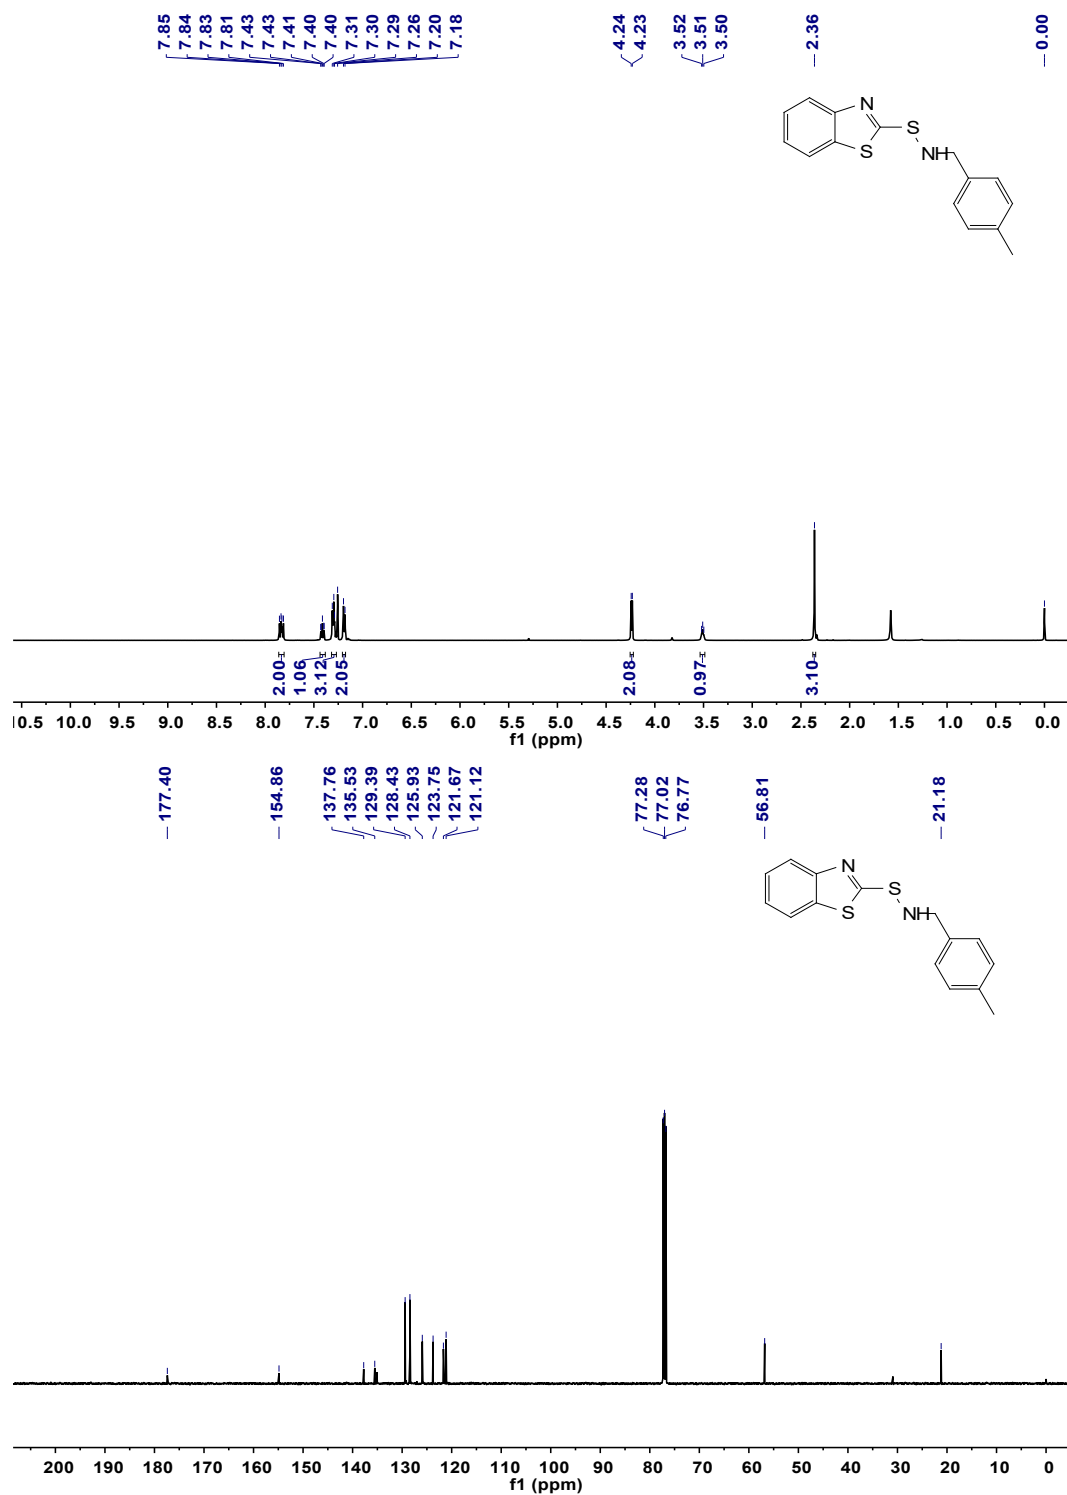

Figure S32.  $^1\text{H}$  NMR and  $^{13}\text{C}$  NMR spectra of compound 5c.

### N-tert-Butyl-2-benzothiazolesulfenamide (6c)

White solid (87% yield), mp: 105-106 °C;  $^1\text{H}$  NMR (500 MHz,  $\text{CDCl}_3$ )  $\delta$ : 7.78 (dd,  $J = 10.9, 8.0$  Hz, 2H), 7.40 – 7.36 (m, 1H), 7.25 (d,  $J = 12.3$  Hz, 1H), 3.42 (s, 1H), 1.28 (s, 9H);  $^{13}\text{C}$  NMR (125 MHz,  $\text{CDCl}_3$ )  $\delta$ : 155.1, 134.9, 125.8, 123.5, 121.5, 120.9, 55.6, 29.0.

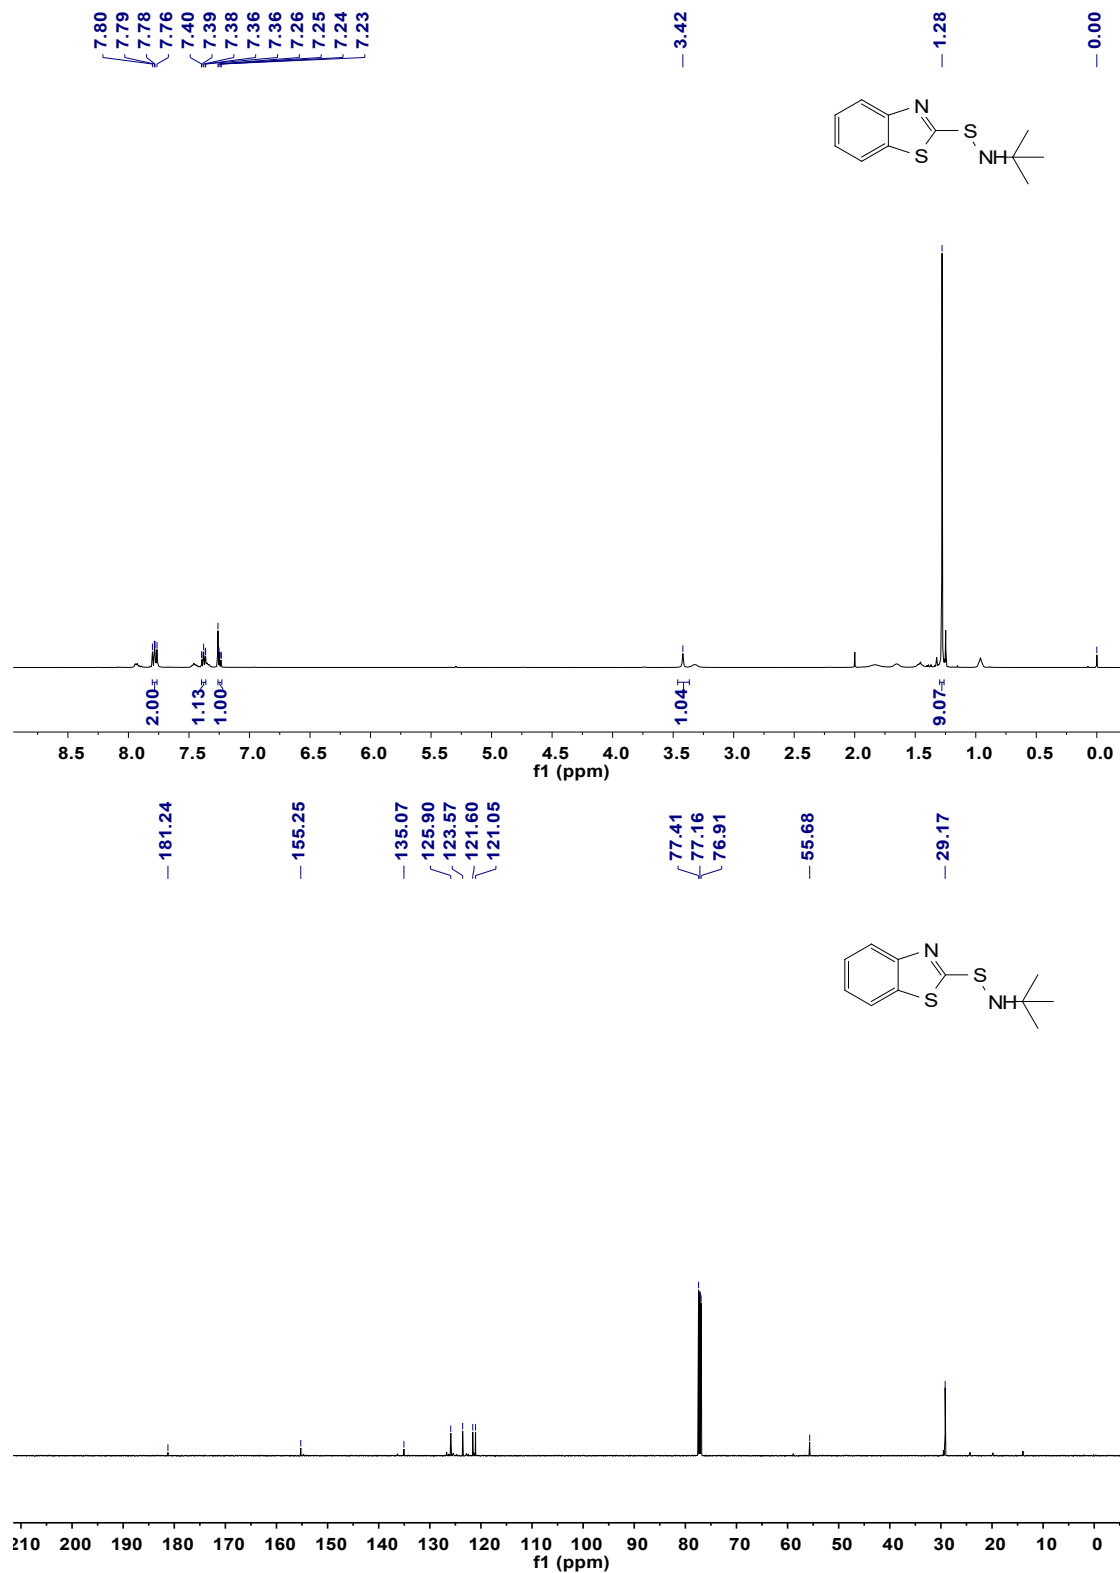

Figure S33.  $^1\text{H}$  NMR and  $^{13}\text{C}$  NMR spectra of compound 6c.

### N-butyl-2-benzothiazolesulfenamide (7c)

Colorless oil (96% yield);  $^1\text{H}$  NMR (500 MHz,  $\text{CDCl}_3$ )  $\delta$ : 7.70 (d,  $J = 8.2$  Hz, 1H), 7.63 (d,  $J = 8.0$  Hz, 1H), 7.26 – 7.21 (m, 1H), 7.13 – 7.07 (m, 1H), 3.30 (d,  $J = 6.0$  Hz, 1H), 2.98 – 2.91 (m, 2H), 1.47 – 1.39 (m, 2H), 1.27 – 1.19 (m, 2H), 0.78 (ddd,  $J = 9.1, 6.7, 1.8$  Hz, 3H);  $^{13}\text{C}$  NMR (125 MHz,  $\text{CDCl}_3$ )  $\delta$ : 155.0, 135.0, 125.9, 123.6, 121.5, 121.1, 52.8, 32.7, 20.0, 14.0.

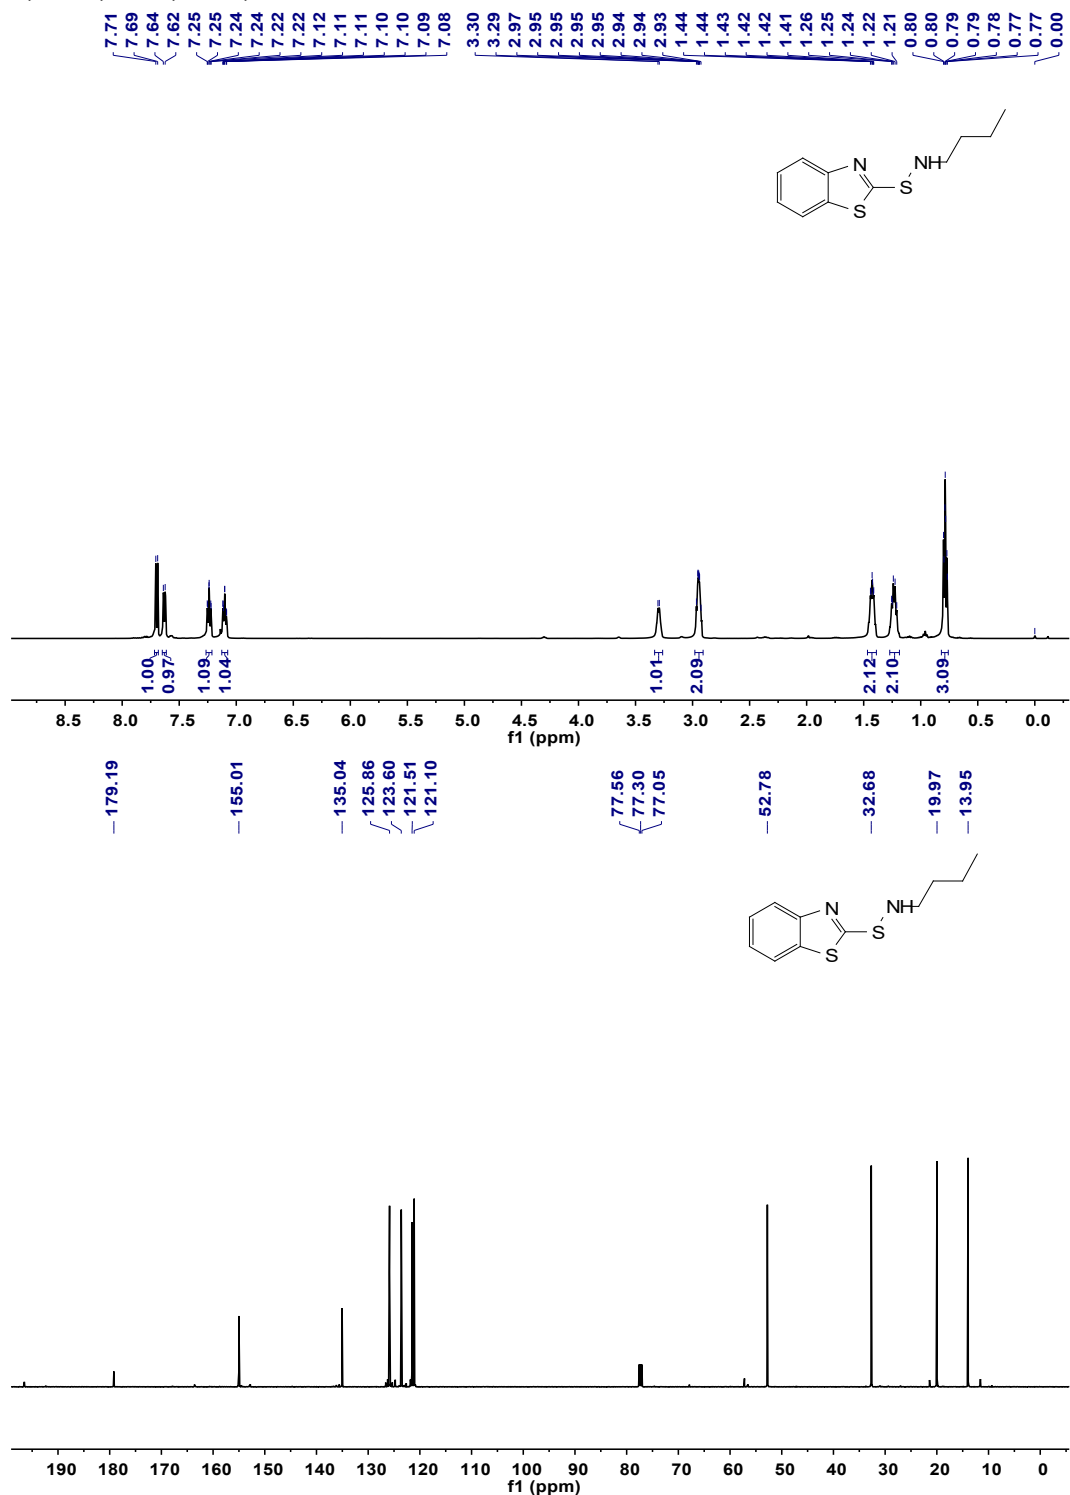

Figure S34.  $^1\text{H}$  NMR and  $^{13}\text{C}$  NMR spectra of compound 7c.

**N-(cyclohexylmethyl)-2-benzothiazolesulfenamide (8c).**

$^1\text{H}$  NMR (500 MHz,  $\text{CDCl}_3$ )  $\delta$ : 7.81 (t,  $J = 9.0$ , 2H), 7.43 – 7.37 (m, 1H), 7.28 (s, 1H), 3.26 (s, 1H), 2.99 (s, 2H), 1.89 – 1.67 (m, 5H), 1.56 (tt,  $J = 6.8$ , Hz, 1H), 1.32 – 1.17 (m, 3H), 0.98 (d,  $J = 15.0$  Hz, 2H);  $^{13}\text{C}$  NMR (126 MHz,  $\text{CDCl}_3$ )  $\delta$ : 178.9, 155.0, 135.0, 125.9, 123.6, 121.6, 121.1, 60.0, 38.8, 30.9, 26.5, 25.9.

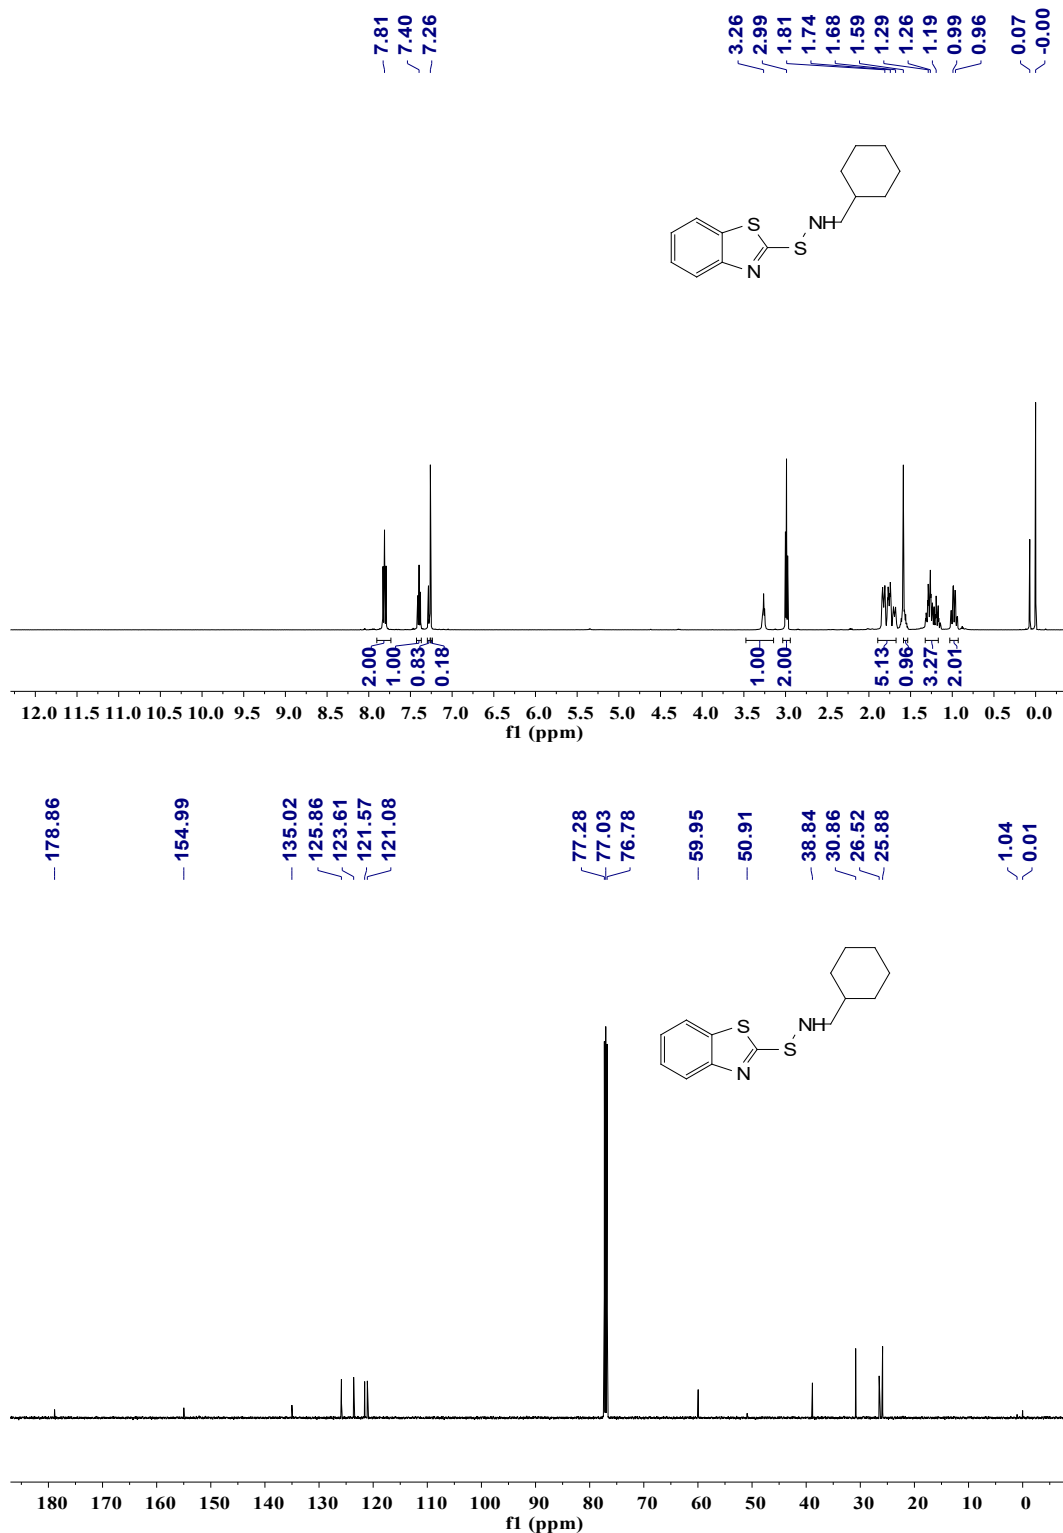

**Figure S35.**  $^1\text{H}$  NMR and  $^{13}\text{C}$  NMR spectra for compound **8c**.



### N,N-diethyl-2-Benzothiazolesulfenamide (9c)

Light yellow oil (73% yield);  $^1\text{H}$  NMR (500 MHz,  $\text{CDCl}_3$ )  $\delta$ : 7.71 (d,  $J = 8.1$  Hz, 1H), 7.66 (d,  $J = 7.9$  Hz, 1H), 7.29 – 7.25 (m, 1H), 7.16 – 7.11 (m, 1H), 3.05 (q,  $J = 7.1$  Hz, 4H), 1.14 (t,  $J = 7.1$  Hz, 6H);  $^{13}\text{C}$  NMR (125 MHz,  $\text{CDCl}_3$ )  $\delta$ : 155.2, 135.0, 125.8, 123.5, 121.5, 120.9, 52.5, 31.0, 13.5.

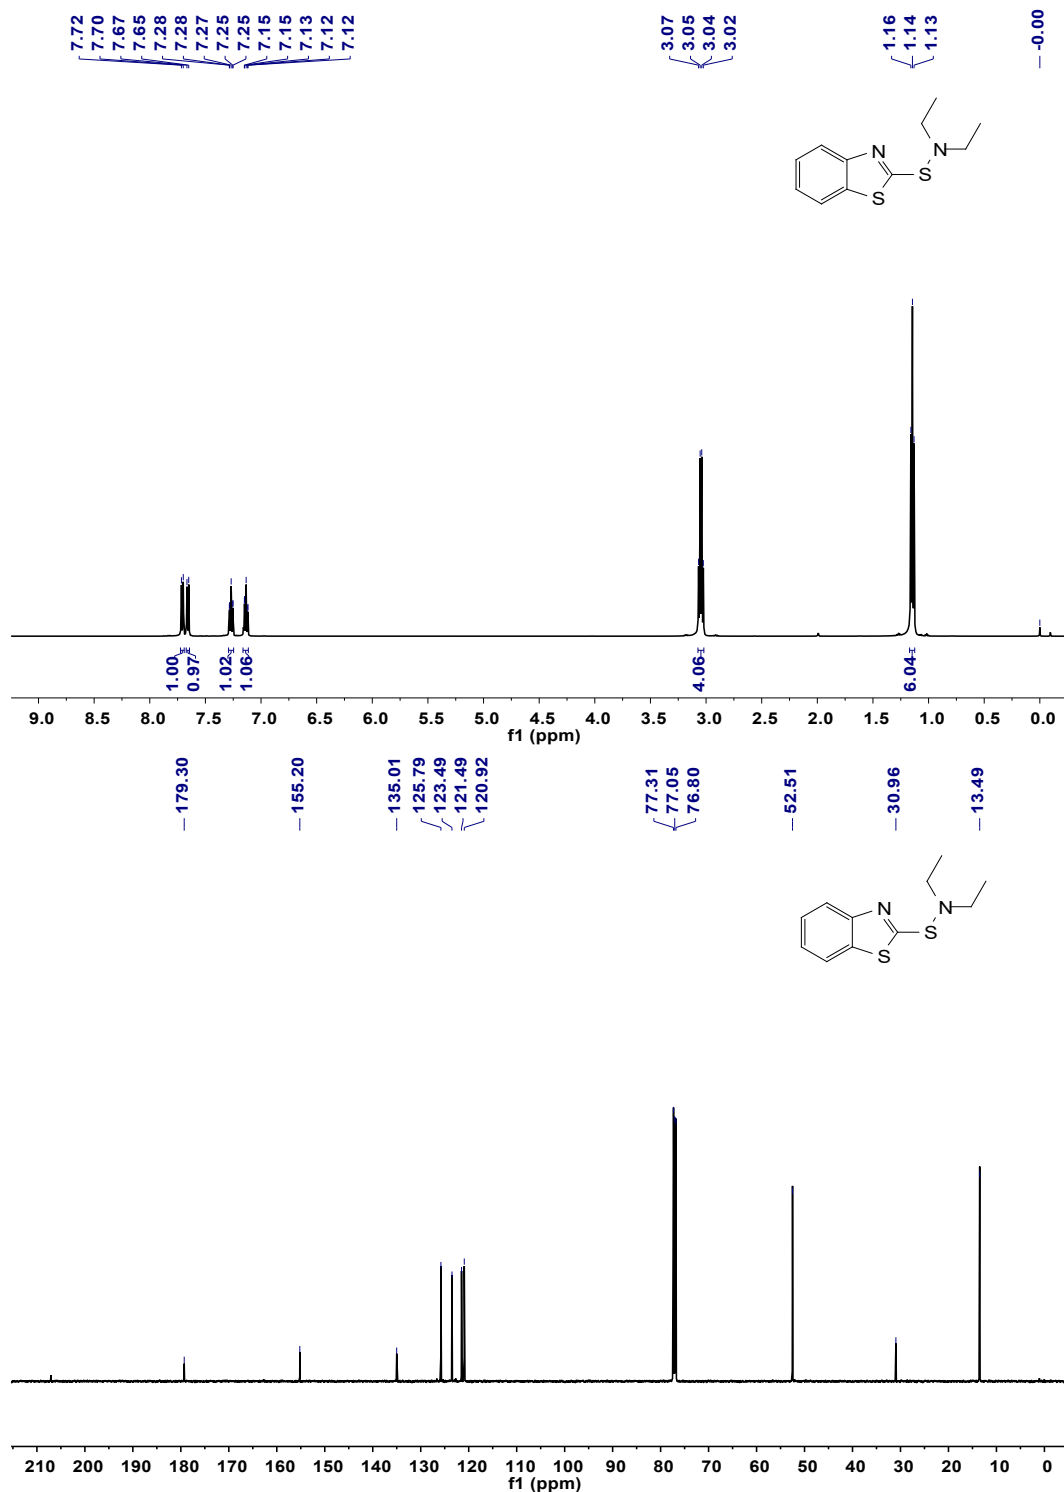

Figure S36.  $^1\text{H}$  NMR and  $^{13}\text{C}$  NMR spectra of compound 9c.

## 2-[(1-piperidinylthio)-Benzothiazole (11c)

Colorless oil (84% yield);  $^1\text{H}$  NMR (500 MHz,  $\text{CDCl}_3$ )  $\delta$ : 7.81 (dd,  $J = 13.0, 8.0$  Hz, 2H), 7.39 (t,  $J = 7.7$  Hz, 1H), 7.28 – 7.24 (m, 1H), 3.23 (t,  $J = 5.4$  Hz, 4H), 1.74 (t,  $J = 5.7$  Hz, 4H), 1.53 (d,  $J = 5.8$  Hz, 2H);  $^{13}\text{C}$  NMR (125 MHz,  $\text{CDCl}_3$ )  $\delta$ : 135.2, 125.8, 123.6, 121.7, 121.0, 58.1, 27.38, 23.1.

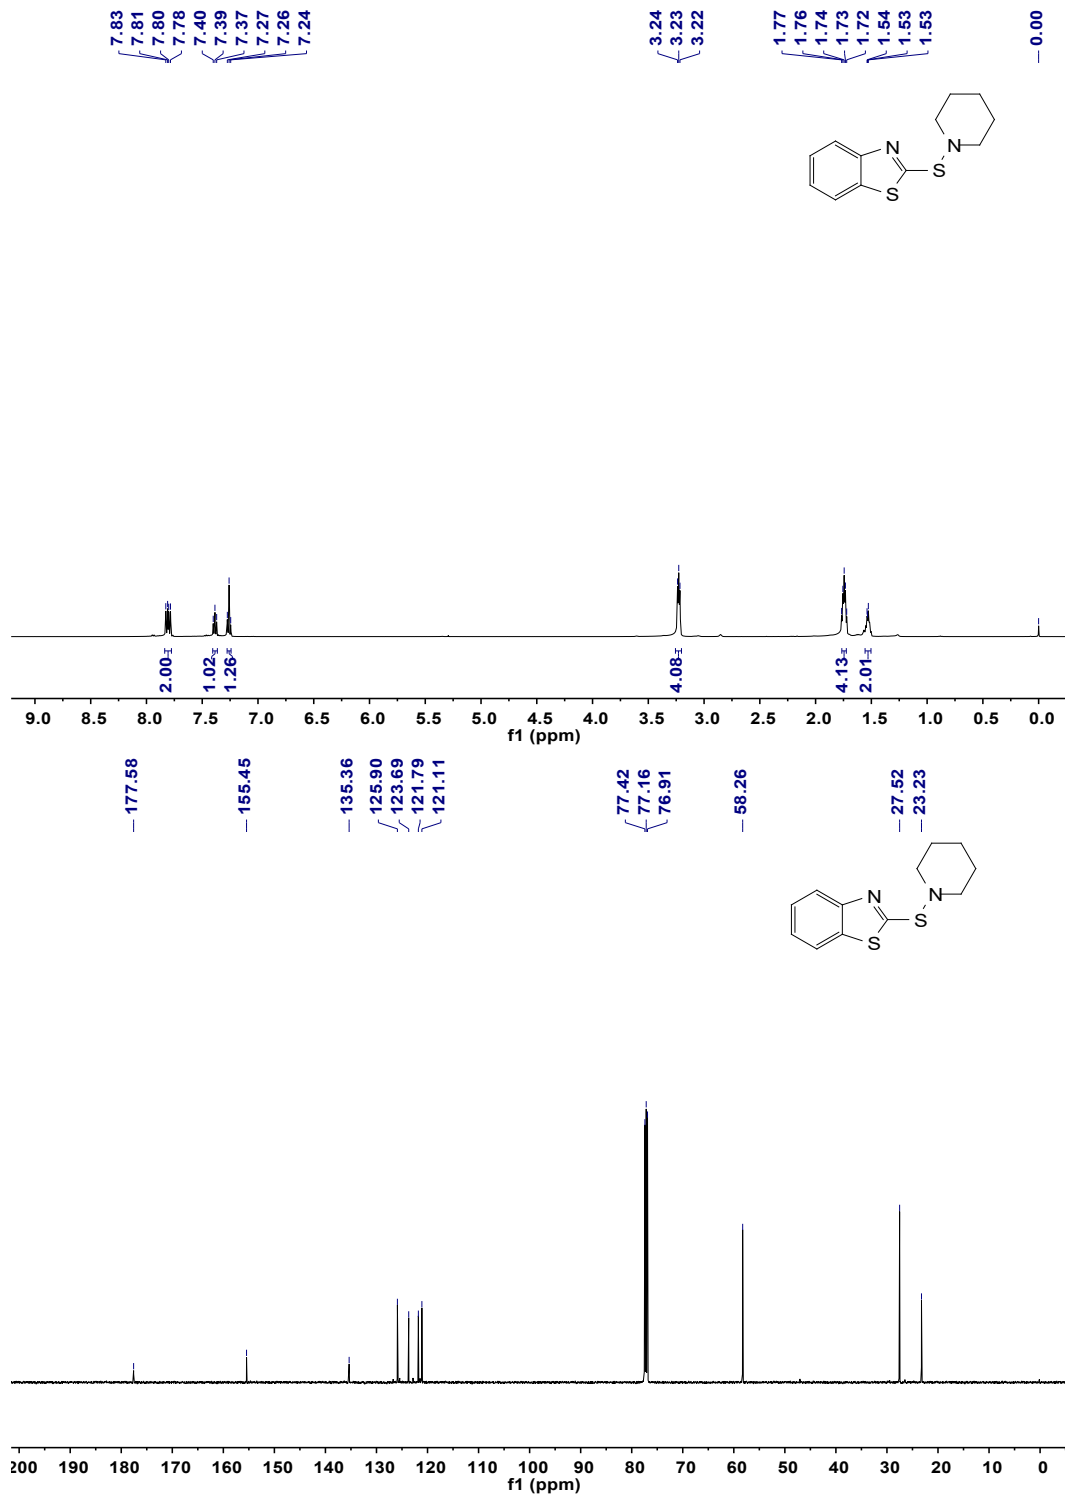

Figure S37.  $^1\text{H}$  NMR and  $^{13}\text{C}$  NMR spectra of compound 11c.

## 2-(4-morpholinylthio)-Benzothiazole (12c)

White solid (81% yield), mp: 80-82 °C;  $^1\text{H}$  NMR (500 MHz,  $\text{CDCl}_3$ )  $\delta$ : 7.85 (d,  $J = 8.1$  Hz, 1H), 7.81 (d,  $J = 7.9$  Hz, 1H), 7.44 – 7.39 (m, 1H), 7.31 – 7.27 (m, 1H), 3.85 – 3.81 (m, 4H), 3.32 – 3.27 (m, 4H);  $^{13}\text{C}$  NMR (125 MHz,  $\text{CDCl}_3$ )  $\delta$ : 175.0, 155.1, 135.0, 126.0, 124.0, 121.9, 121.1, 67.9, 56.6.

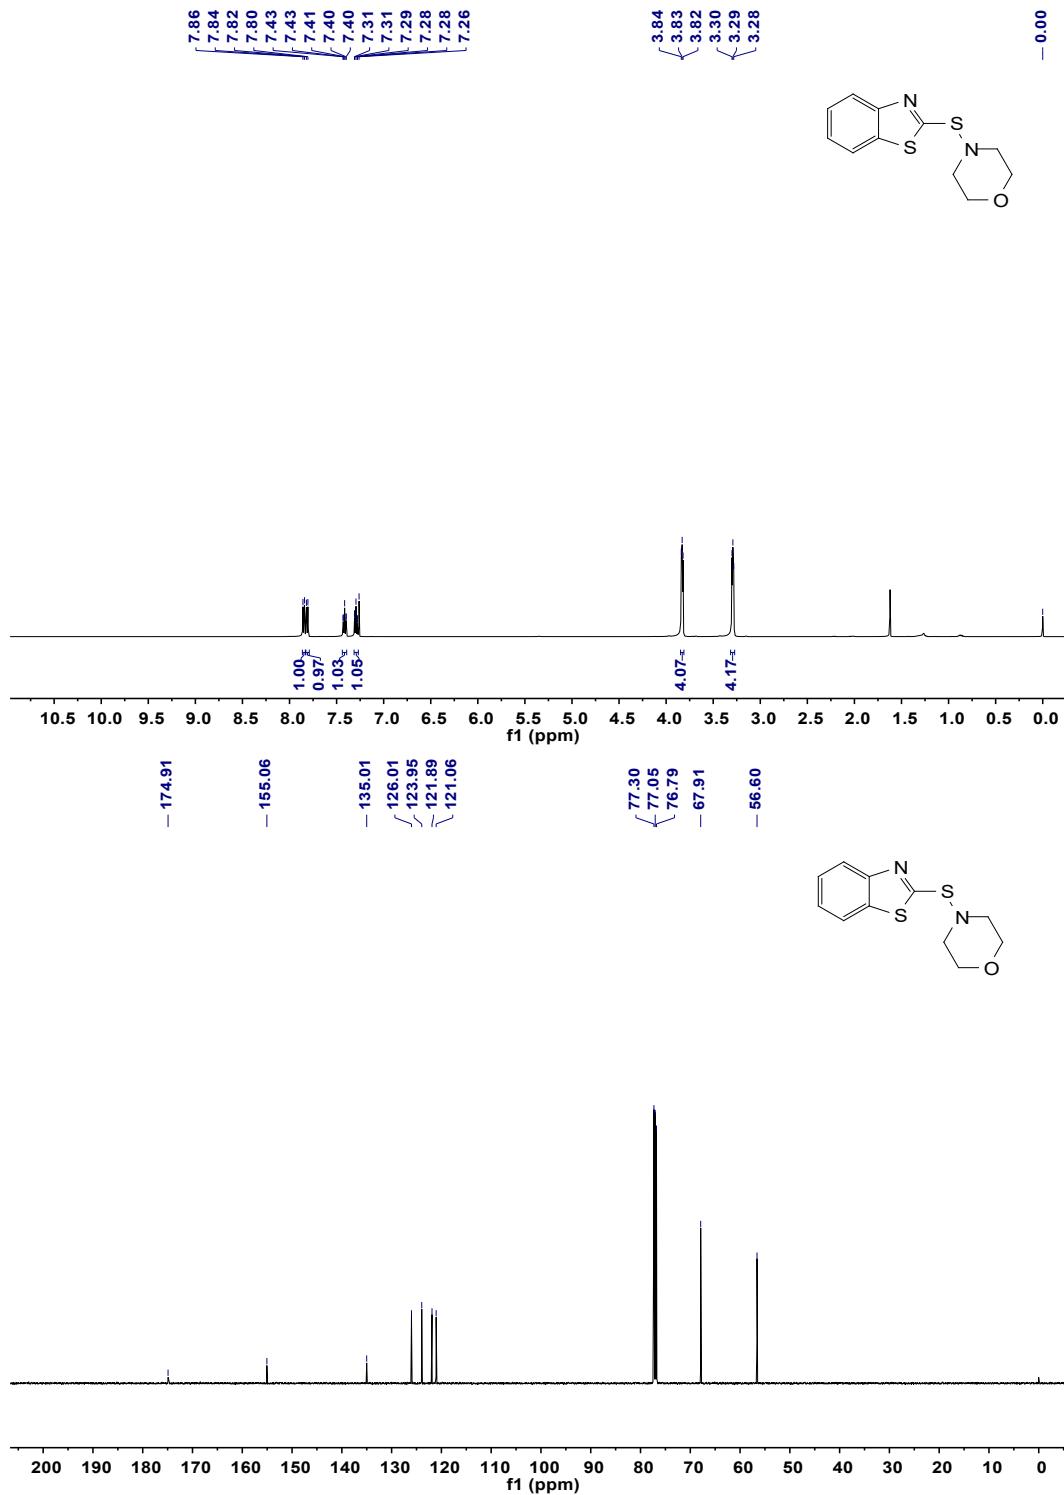

Figure S38.  $^1\text{H}$  NMR and  $^{13}\text{C}$  NMR spectra of compound 12c.

## References

- [1] L. Yang, S. Li, Y. Dou, S. Zhen, H. Li, P. Zhang, B. Yuan, G. Yang, *Asian J. Org. Chem.*, 2017, **6**, 265-268.
- [2] Y. Dou, X. Huang, H. Wang, L. Yang, H. Li, B. Yuan, G. Yang, *Green Chem.*, 2017, **19**, 2491-2495.
- [3] D. J. Banks, P. Wiseman, *J. Appl. Chem.*, 1968, **18**, 262-265.
- [4] H. Li, F. Han, L. Jiang, T. Yang, L. Du, J. Zhu, *Ind. Eng. Chem. Res.*, 2021, **60**, 14134-14142.
- [5] B. Zhong, H. Dong, J. Lin, Z. Jia, Y. Luo, D. Jia, F. Liu, *Ind. Eng. Chem. Res.*, 2017, **56**, 9135-9142.
